# Supplementary material for: Behaviour of PPCP substances in a fluvial aquifer after infiltration of treated wastewater
Source: Research Square preprint supplement (doi:10.21203/rs.3.rs-3023391/v1), 2023-06-07
Supplement: Supplementary file 1 [file 8f2ae995209daefbfa0eaab1.xlsx]

## Sheet: List1
	Concentration of Benzotriazol in ng/l
Date of sampling	WWTP	Morava River	CP1 well	PZ1 well	PZ5 well
2022-11-07	4390	657	<20	<20	159
2022-11-20	6640	459	<20	<20	155
2022-11-24	6610	606	93	<20	173
2022-11-30	6290	471	196	62	124
2022-12-08	5620	838	analysis error	167	168
2022-12-12	2140	498	420	187	155
Average	5282	588	236	69	156
Median	5955	552	93	31	157
