# Supplementary material for: Behaviour of PPCP substances in a fluvial aquifer after infiltration of treated wastewater
Source: Research Square preprint supplement (doi:10.21203/rs.3.rs-3023391/v1), 2023-06-07
Supplement: Supplementary file 2 [file b1d6dd906adcd70ae1c99f21.xlsx]

## Sheet: všechno
Č.vzorku		83	7877	8199	8367	8372	8534	8539	průměr	84	7878	8200	8368	8373	8535	8540		7879	8201	8369	8374	8536	8541		82	7880	8202	8370	8375	8537	8542		7881	8203	8371	8376	8538	8543
Datum odběru		2021-11-20	2022-11-07	2022-11-20	2022-11-24	2022-11-30	2022-12-08	2022-12-12		2021-11-20	2022-11-07	2022-11-20	2022-11-24	2022-11-30	2022-12-08	2022-12-12		2022-11-07	2022-11-20	2022-11-24	2022-11-30	2022-12-08	2022-12-12		2021-11-20	2022-11-07	2022-11-20	2022-11-24	2022-11-30	2022-12-08	2022-12-12		2022-11-07	2022-11-20	2022-11-24	2022-11-30	2022-12-08	2022-12-12
Název vzorku		ČOV	ČOV	ČOV	ČOV	ČOV	ČOV	ČOV		PZ1	PZ1	PZ1	PZ1	PZ1	PZ1	PZ1		CP1	CP1	CP1	CP1	CP1	CP1		MORAVA	Morava	Morava	Morava	Morava	Morava	Morava		PZ5	PZ5	PZ5	PZ5	PZ5	PZ5
Karbamazepin	ng/l	187	353	273	324	376	184	221	274	16.2	18.9	17.4	22.1	36.2	45.2	49.6		18.4	12.5	25.4	39.3	15.8	56.4		28.7	39.9	48.3	46	43.7	54.7	35.4	42.3857	35.3	35.4	33.6	42	38.5	42.2	37.8333
Erythromycin	ng/l	<10,0	<10,0	10.5	<10,0	<10,0	<10,0	11.7		<10,0	<10,0	<10,0	<10,0	<10,0	<10,0	<10,0		<10,0	<10,0	<10,0	<10,0	<10,0	<10,0		<10,0	<10,0	<10,0	<10,0	<10,0	<10,0	<10,0		<10,0	<10,0	<10,0	<10,0	<10,0	<10,0
Sulfamethoxazol	ng/l	543	520	750	1050	1080	1120	1710	967.571	<10,0	<10,0	<10,0	<10,0	<10,0	<10,0	<10,0		<10,0	<10,0	<10,0	<10,0	<10,0	<10,0		36.6	47	70.5	55.1	66.1	81.1	57	59.0571	<10,0	<10,0	<10,0	<10,0	<10,0	<10,0
Iopromide	ng/l	52.3	70.9	313	240	2670	<50,0	93.5	573.283	<50,0	<50,0	<50,0	<50,0	80.7	74.9	77.6		<50,0	<50,0	78.3	61.8	<50,0	92.8		237	520	638	182	616	1400	504	585.286	<50,0	<50,0	<50,0	<50,0	<50,0	<50,0
Ibuprofen	ng/l	<20,0	22.5	57.2	27	<20,0	<20,0	<20,0		<20,0	<20,0	40.5	<20,0	<20,0	<20,0	<20,0		<20,0	20.6	<20,0	51.6	<20,0	<20,0		32	252	51.2	28.4	22.5	137	46	81.3	<20,0	95.9	<20,0	<20,0	<20,0	<20,0
Diclofenac	ng/l	844	1580	1690	1650	3160	1440	1190	1650.57	<20,0	26	32.9	57.2	191	322	263		21.9	<20,0	112	263	31.9	296		85.1	106	151	123	140	227	142	139.157	26.7	45.6	25.4	33	31.4	28	31.6833
Iopamidol	ng/l	<50,0	<50,0	<50,0	<50,0	<50,0	<50,0	<50,0		<50,0	<50,0	<50,0	<50,0	<50,0	<50,0	<50,0		<50,0	<50,0	<50,0	<50,0	<50,0	<50,0		<50,0	<50,0	<50,0	<50,0	<50,0	<50,0	<50,0		<50,0	<50,0	<50,0	<50,0	<50,0	<50,0
Atenolol	ng/l	38.5	36.4	29.8	27.2	29.5	49.2	70.5	40.1571	<10,0	<10,0	<10,0	<10,0	<10,0	<10,0	<10,0		<10,0	<10,0	<10,0	<10,0	<10,0	<10,0		<10,0	<10,0	<10,0	<10,0	<10,0	10	10.2		<10,0	<10,0	<10,0	<10,0	<10,0	<10,0
Caffein	ng/l	<100	<100	<100	<100	<100	<100	<100		<100	<100	417	<100	<100	<100	<100		<100	<100	<100	836	<100	<100		<100	<100	<100	<100	<100	201	145		<100	485	<100	<100	<100	<100
Ketoprofen	ng/l	20.1	25.6	45	41.5	46.1	36.5	85.4	42.8857	<10,0	<10,0	13.7	<10,0	<10,0	<10,0	<10,0		<10,0	<10,0	<10,0	49.8	<10,0	<10,0		<10,0	<10,0	<10,0	<10,0	<10,0	<10,0	<10,0		<10,0	14.8	<10,0	<10,0	<10,0	<10,0
Metoprolol	ng/l	573	789	810	1020	1120	568	675	793.571	<10,0	<10,0	<10,0	<10,0	<10,0	<10,0	<10,0		<10,0	<10,0	<10,0	<10,0	<10,0	<10,0		51.2	41.5	67.2	51	59.1	87.5	54.2	58.8143	<10,0	21.8	<10,0	<10,0	<10,0	<10,0
Peniciline G	ng/l	<10,0	<10,0	<10,0	<10,0	<10,0	<10,0	<10,0		<10,0	<10,0	<10,0	<10,0	<10,0	<10,0	<10,0		<10,0	<10,0	<10,0	<10,0	<10,0	<10,0		<10,0	<10,0	<10,0	<10,0	<10,0	<10,0	<10,0		<10,0	<10,0	<10,0	<10,0	<10,0	<10,0
Sulfamerazine	ng/l	<10,0	<10,0	<10,0	<10,0	<10,0	<10,0	<10,0		<10,0	<10,0	<10,0	<10,0	<10,0	<10,0	<10,0		<10,0	<10,0	<10,0	<10,0	<10,0	<10,0		<10,0	<10,0	<10,0	<10,0	<10,0	<10,0	<10,0		<10,0	<10,0	<10,0	<10,0	<10,0	<10,0
Sulfamethazin	ng/l	<10,0	<10,0	<10,0	<10,0	<10,0	<10,0	<10,0		23.7	28.2	29.5	33.9	45.1	29.9	28.6		36.2	24.1	37.2	39	28.2	42.5		<10,0	<10,0	<10,0	<10,0	<10,0	<10,0	<10,0		25.9	32.4	34.6	43	42.4	45.7	37.3333
Sulfapyridin	ng/l	148	303	192	269	262	319	356	264.143	<10,0	10.6	<10,0	<10,0	26.4	51.8	55.5		11.3	<10,0	22.4	33.3	11.4	68.4		14	20.8	24.4	19.5	24.6	38.4	22.4	23.4429	19.4	<10,0	11.9	13.2	15.7	18.4	15.72
Trimetoprim	ng/l	136	139	178	203	214	258	427	222.143	<10,0	<10,0	<10,0	<10,0	<10,0	<10,0	<10,0		<10,0	<10,0	<10,0	<10,0	<10,0	<10,0		<10,0	<10,0	13.1	<10,0	10.3	19.2	10.8		<10,0	<10,0	<10,0	<10,0	<10,0	<10,0
Furosemide	ng/l	542	847	786	559	763	788	1240	789.286	<50,0	<50,0	<50,0	<50,0	97.6	121	128		<50,0	<50,0	62	62	<50,0	142		<50,0	<50,0	<50,0	<50,0	<50,0	127	92.8		<50,0	<50,0	<50,0	<50,0	<50,0	<50,0
Gemfibrozil	ng/l	<10,0	<10,0	<10,0	<10,0	<10,0	<10,0	<10,0		<10,0	<10,0	<10,0	<10,0	<10,0	<10,0	<10,0		<10,0	<10,0	<10,0	<10,0	<10,0	<10,0		<10,0	<10,0	<10,0	<10,0	<10,0	<10,0	<10,0		<10,0	<10,0	<10,0	<10,0	<10,0	<10,0
Hydrochlorothiazide	ng/l	981	1600	1360	1770	2120	1350	1690	1553	<50,0	<50,0	<50,0	<50,0	102	174	181		<50,0	<50,0	68.3	120	<50,0	198		92.4	96.3	141	99.1	104	176	108	116.686	<50,0	<50,0	<50,0	<50,0	<50,0	<50,0
Naproxene	ng/l	<50,0	<50,0	54.4	<50,0	<50,0	69	56.7		<50,0	<50,0	<50,0	<50,0	<50,0	<50,0	<50,0		<50,0	<50,0	<50,0	<50,0	<50,0	<50,0		<50,0	<50,0	<50,0	<50,0	<50,0	<50,0	<50,0		<50,0	<50,0	<50,0	<50,0	<50,0	<50,0
Triclocarban	ng/l	<10,0	<10,0	<10,0	<10,0	<10,0	<10,0	<10,0		<10,0	<10,0	<10,0	<10,0	<10,0	<10,0	<10,0		<10,0	<10,0	<10,0	<10,0	<10,0	<10,0		<10,0	<10,0	<10,0	<10,0	<10,0	<10,0	<10,0		<10,0	<10,0	<10,0	<10,0	<10,0	<10,0
Triclosan	ng/l	<20,0	<20,0	<20,0	<20,0	<20,0	<20,0	<20,0		<20,0	<20,0	<20,0	<20,0	<20,0	<20,0	<20,0		<20,0	<20,0	<20,0	<20,0	<20,0	<20,0		<20,0	<20,0	<20,0	<20,0	<20,0	<20,0	<20,0		<20,0	<20,0	<20,0	<20,0	<20,0	<20,0
Chloramphenicol	ng/l	<20,0	<20,0	<20,0	<20,0	<20,0	<20,0	<20,0		<20,0	<20,0	<20,0	<20,0	<20,0	<20,0	<20,0		<20,0	<20,0	<20,0	<20,0	<20,0	<20,0		<20,0	<20,0	<20,0	<20,0	<20,0	<20,0	<20,0		<20,0	<20,0	<20,0	<20,0	<20,0	<20,0
Bezafibrate	ng/l	<10,0	<10,0	<10,0	<10,0	<10,0	<10,0	<10,0		<10,0	<10,0	<10,0	<10,0	<10,0	<10,0	<10,0		<10,0	<10,0	<10,0	<10,0	<10,0	<10,0		<10,0	<10,0	<10,0	<10,0	<10,0	<10,0	<10,0		<10,0	<10,0	<10,0	<10,0	<10,0	<10,0
Warfarin	ng/l	<10,0	10.1	10	10.3	12.3	<10,0	10.4	10.62	<10,0	<10,0	<10,0	<10,0	<10,0	<10,0	<10,0		<10,0	<10,0	<10,0	<10,0	<10,0	<10,0		<10,0	26.5	11.7	<10,0	<10,0	37.9	12.3		<10,0	<10,0	<10,0	<10,0	<10,0	<10,0
Saccharin	ng/l	<50,0	<50,0	162	<50,0	<50,0	<50,0	56.5		<50,0	<50,0	172	<50,0	<50,0	<50,0	<50,0		<50,0	54.2	<50,0	190	<50,0	<50,0		70.8	<50,0	159	142	122	323	195	168.633	<50,0	164	<50,0	<50,0	<50,0	<50,0
Gabapentin	ng/l	212	949	710	462	654	680	1160	689.571	24.4	82.2	54.8	81.5	185	220	240		85.4	40.7	126	59.2	50.6	251		177	189	204	224	209	288	233	217.714	<10,0	<10,0	<10,0	<10,0	<10,0	<10,0
Tramadol	ng/l	851	2010	1380	2090	2870	1240	1270	1673	<10,0	<10,0	<10,0	<10,0	<10,0	<10,0	<10,0		<10,0	<10,0	<10,0	<10,0	<10,0	<10,0		79.3	103	153	103	94.9	140	90.7	109.129	37.7	31.2	31.1	34.5	29.9	29.5	32.3167
Paracetamol	ng/l	<10,0	<10,0	28	<10,0	16.2	<10,0	16.4		<10,0	<10,0	17.8	<10,0	<10,0	<10,0	<10,0		<10,0	<10,0	<10,0	20.8	<10,0	<10,0		20.9	<10,0	18.7	17.5	12.2	40.7	61.6	28.6	<10,0	36.4	<10,0	<10,0	<10,0	<10,0
Sulfanilamide	ng/l	50.3	285	56	81	68.7	233	232	143.714	51.5	<50,0	<50,0	65.3	111	96.1	97.7		<50,0	<50,0	69.2	55.9	<50,0	102		<50,0	<50,0	<50,0	<50,0	<50,0	<50,0	<50,0		69.9	65.8	98.3	96.9	143	138	101.983
Clarithromycin	ng/l	208	34	211	281	291	385	710	302.857	<10,0	<10,0	<10,0	<10,0	<10,0	<10,0	<10,0		<10,0	<10,0	<10,0	<10,0	<10,0	<10,0		41.5	23.9	33.9	29	46.7	65.8	56.6	42.4857	<10,0	<10,0	<10,0	<10,0	<10,0	<10,0
Roxithromycin	ng/l	<10,0	<10,0	<10,0	<10,0	<10,0	<10,0	<10,0		<10,0	<10,0	<10,0	<10,0	<10,0	<10,0	<10,0		<10,0	<10,0	<10,0	<10,0	<10,0	<10,0		<10,0	<10,0	<10,0	<10,0	<10,0	<10,0	<10,0		<10,0	<10,0	<10,0	<10,0	<10,0	<10,0
Azithromycin	ng/l	240	544	587	975	1680	653	987	809.429	<10,0	<10,0	<10,0	<10,0	<10,0	<10,0	<10,0		<10,0	<10,0	<10,0	<10,0	<10,0	<10,0		<10,0	<10,0	<10,0	<10,0	<10,0	<10,0	<10,0		<10,0	<10,0	<10,0	<10,0	<10,0	<10,0
Karbamazepin-E	ng/l	19.2	33.1	22.6	27.1	29.9	23.4	25.3	25.8	<10,0	<10,0	<10,0	<10,0	<10,0	<10,0	<10,0		<10,0	<10,0	<10,0	<10,0	<10,0	<10,0		<10,0	<10,0	<10,0	<10,0	<10,0	<10,0	<10,0		<10,0	<10,0	<10,0	<10,0	<10,0	<10,0
Karbamazepin-DHH	ng/l	22.9	21.3	31.2	33.6	40.8	38.3	42	32.8714	<10,0	<10,0	<10,0	<10,0	<10,0	<10,0	<10,0		<10,0	<10,0	<10,0	<10,0	<10,0	<10,0		<10,0	<10,0	<10,0	<10,0	<10,0	<10,0	<10,0		<10,0	<10,0	<10,0	<10,0	<10,0	<10,0
Karbamazepin-DH	ng/l	<10,0	<10,0	<10,0	<10,0	<10,0	<10,0	<10,0		<10,0	<10,0	<10,0	<10,0	<10,0	<10,0	<10,0		<10,0	<10,0	<10,0	<10,0	<10,0	<10,0		<10,0	<10,0	<10,0	<10,0	<10,0	<10,0	<10,0		<10,0	<10,0	<10,0	<10,0	<10,0	<10,0
Oxcarbazepine	ng/l	57.8	51.7	74.3	92.1	80.5	83.2	97.2	76.6857	<10,0	<10,0	<10,0	<10,0	<10,0	<10,0	<10,0		<10,0	<10,0	<10,0	<10,0	<10,0	<10,0		<10,0	<10,0	<10,0	<10,0	<10,0	<10,0	<10,0		<10,0	<10,0	<10,0	<10,0	<10,0	<10,0
Ibuprofen-2-hydroxy	ng/l	<30,0	<30,0	<30,0	<30,0	<30,0	<30,0	<30,0		<30,0	<30,0	<30,0	<30,0	<30,0	<30,0	<30,0		<30,0	<30,0	<30,0	<30,0	<30,0	<30,0		90.3	98.7	68.8	110	65.7	318	157	129.786	<30,0	<30,0	<30,0	<30,0	<30,0	<30,0
Ibuprofen-carboxy	ng/l	<20,0	<20,0	<20,0	<20,0	<20,0	<20,0	<20,0		<20,0	<20,0	<20,0	<20,0	<20,0	<20,0	<20,0		<20,0	<20,0	<20,0	<20,0	<20,0	<20,0		27.6	<20,0	<20,0	30.5	29.7	59.1	62.1		<20,0	<20,0	<20,0	<20,0	<20,0	<20,0
Diclofenac-4-hydroxy	ng/l	483	1010	572	639	635	743	894	710.857	<20,0	<20,0	<20,0	23.7	66.1	140	141		<20,0	<20,0	41.4	68.8	<20,0	146		<20,0	<20,0	34.6	<20,0	25.2	54	34.5		<20,0	<20,0	<20,0	<20,0	<20,0	<20,0
Naproxene-O-desmeth.	ng/l	<20,0	<20,0	49.2	22.8	60.3	42	45		<20,0	<20,0	<20,0	<20,0	<20,0	<20,0	<20,0		<20,0	<20,0	<20,0	<20,0	<20,0	<20,0		<20,0	<20,0	<20,0	<20,0	<20,0	<20,0	<20,0		<20,0	<20,0	<20,0	<20,0	<20,0	<20,0
Venlafaxine	ng/l	129	225	215	264	270	202	247	221.714	<10,0	<10,0	<10,0	<10,0	<10,0	<10,0	<10,0		<10,0	<10,0	<10,0	<10,0	<10,0	<10,0		20.1	20.3	27	18.6	22.4	32.1	20.7	23.0286	<10,0	<10,0	<10,0	<10,0	<10,0	<10,0
Sertraline	ng/l	19.8	25.4	17.8	24.1	22.7	23.3	22.9	22.2857	<10,0	<10,0	<10,0	<10,0	<10,0	<10,0	<10,0		<10,0	<10,0	<10,0	<10,0	<10,0	<10,0		<10,0	<10,0	<10,0	<10,0	<10,0	<10,0	<10,0		<10,0	<10,0	<10,0	<10,0	<10,0	<10,0
Ranitidine	ng/l	<10,0	<10,0	<10,0	<10,0	<10,0	<10,0	<10,0		<10,0	<10,0	<10,0	<10,0	<10,0	<10,0	<10,0		<10,0	<10,0	<10,0	<10,0	<10,0	<10,0		<10,0	<10,0	<10,0	<10,0	<10,0	<10,0	<10,0		<10,0	<10,0	<10,0	<10,0	<10,0	<10,0
Iohexol	ng/l	<50,0	<50,0	<50,0	<50,0	<50,0	<50,0	<50,0		<50,0	<50,0	<50,0	<50,0	<50,0	<50,0	<50,0		<50,0	<50,0	<50,0	<50,0	<50,0	<50,0		70.4	<50,0	<50,0	<50,0	80.4	143	57.1		<50,0	<50,0	<50,0	<50,0	<50,0	<50,0
Karbamazepin-2-hydr.	ng/l	28.7	71.1	46.4	58.7	68.6	50.1	62.6	55.1714	<10,0	<10,0	<10,0	<10,0	<10,0	<10,0	<10,0		<10,0	<10,0	<10,0	<10,0	<10,0	<10,0		<10,0	<10,0	<10,0	<10,0	<10,0	<10,0	<10,0		<10,0	<10,0	<10,0	<10,0	<10,0	<10,0
Clofibric acid	ng/l	<10,0	<10,0	<10,0	<10,0	<10,0	<10,0	<10,0		<10,0	<10,0	<10,0	<10,0	<10,0	<10,0	<10,0		<10,0	<10,0	<10,0	<10,0	<10,0	<10,0		<10,0	<10,0	<10,0	<10,0	<10,0	<10,0	<10,0		<10,0	<10,0	<10,0	<10,0	<10,0	<10,0
Cotinine	ng/l	<20,0	<20,0	<20,0	<20,0	<20,0	<20,0	25.3		<20,0	<20,0	<20,0	<20,0	<20,0	<20,0	<20,0		<20,0	<20,0	<20,0	34.8	<20,0	<20,0		<20,0	<20,0	<20,0	<20,0	<20,0	<20,0	<20,0		<20,0	<20,0	<20,0	<20,0	<20,0	<20,0
Paraxanthine	ng/l	<100	<100	115	<100	<100	<100	<100		<100	<100	170	<100	<100	<100	<100		<100	<100	<100	544	<100	<100		<100	<100	<100	<100	<100	241	115		<100	290	<100	<100	<100	<100
Acesulfam	ng/l	107	102	146	74.3	119	122	229	128.471	221	185	221	234	217	216	206		142	171	200	187	158	205		174	151	288	217	220	356	288	242	137	169	164	167	226	208	178.5
Bisfenol B	ng/l	<50,0	<50,0	<50,0	<50,0	<50,0	<50,0	<50,0		<50,0	<50,0	<50,0	<50,0	<50,0	<50,0	<50,0		<50,0	<50,0	<50,0	<50,0	<50,0	<50,0		<50,0	<50,0	<50,0	<50,0	<50,0	<50,0	<50,0		<50,0	<50,0	<50,0	<50,0	<50,0	<50,0
Bisfenol S	ng/l	<50,0	<20,0	<20,0	27.3	<20,0	<20,0	<20,0		<50,0	<20,0	46.9	<20,0	<20,0	<20,0	<20,0		<20,0	<20,0	<20,0	65.2	<20,0	<20,0		<50,0	<20,0	<20,0	<20,0	<20,0	<20,0	<20,0		<20,0	104	<20,0	<20,0	<20,0	<20,0
Oxypurinol	ng/l	7820	10200	13400	17100	21800	14700	12300	13902.9	<50,0	<50,0	<50,0	<50,0	299	811	1070		<50,0	<50,0	338	849	69.2	1690		1420	729	2350	1960	2270	3050	1600	1911.29	270	540	438	328	427	366	394.833
Tiamulin	ng/l	<10,0	<10,0	<10,0	<10,0	<10,0	<10,0	<10,0		<10,0	<10,0	<10,0	<10,0	<10,0	<10,0	<10,0		<10,0	<10,0	<10,0	<10,0	<10,0	<10,0		<10,0	<10,0	<10,0	<10,0	<10,0	<10,0	<10,0		<10,0	<10,0	<10,0	<10,0	<10,0	<10,0
Acebutolol	ng/l	65.5	235	191	209	200	131	152		<10,0	<10,0	<10,0	<10,0	<10,0	<10,0	<10,0		<10,0	<10,0	<10,0	<10,0	<10,0	<10,0		12.2	12.1	17.8	11.9	13.7	19.4	13.3	14.3429	<10,0	<10,0	<10,0	<10,0	<10,0	<10,0
Alfuzosin	ng/l	<10,0	<10,0	<10,0	<10,0	<10,0	<10,0	<10,0		<10,0	<10,0	<10,0	<10,0	<10,0	<10,0	<10,0		<10,0	<10,0	<10,0	<10,0	<10,0	<10,0		37.8	13.9	16.4	<10,0	13.2	36.6	15.9	22.3	<10,0	<10,0	<10,0	<10,0	<10,0	<10,0
Bisoprolol	ng/l	102	136	138	128	158	142	202	143.714	<10,0	<10,0	<10,0	<10,0	<10,0	<10,0	<10,0		<10,0	<10,0	<10,0	<10,0	<10,0	<10,0		12.1	<10,0	13.3	10.2	13.2	23.7	15.3	14.6333	<10,0	<10,0	<10,0	<10,0	<10,0	<10,0
Celiprolol	ng/l	147	284	308	365	382	179	209	267.714	<10,0	<10,0	<10,0	<10,0	<10,0	<10,0	<10,0		<10,0	<10,0	<10,0	<10,0	<10,0	<10,0		12.3	12.8	13.3	15.5	14.8	16	15.1	14.2571	<10,0	<10,0	<10,0	<10,0	<10,0	<10,0
Citalopram	ng/l	68.5	147	109	134	142	101	122	117.643	<20,0	<20,0	<20,0	<20,0	<20,0	<20,0	<20,0		<20,0	<20,0	<20,0	<20,0	<20,0	<20,0		<20,0	<20,0	<20,0	<20,0	<20,0	<20,0	<20,0		<20,0	<20,0	<20,0	<20,0	<20,0	<20,0
Clindamycin	ng/l	<10,0	37.1	21.5	53.1	57.6	44	36.4	41.6167	<10,0	<10,0	<10,0	<10,0	<10,0	<10,0	<10,0		<10,0	<10,0	<10,0	<10,0	<10,0	<10,0		<10,0	<10,0	<10,0	<10,0	<10,0	11.8	<10,0		<10,0	<10,0	<10,0	<10,0	<10,0	<10,0
Cyclophosphamide	ng/l	21.4	13.6	<10,0	<10,0	34.9	<10,0	<10,0		<10,0	<10,0	<10,0	<10,0	<10,0	<10,0	<10,0		<10,0	<10,0	<10,0	<10,0	<10,0	<10,0		<10,0	<10,0	<10,0	<10,0	<10,0	<10,0	<10,0		<10,0	<10,0	<10,0	<10,0	<10,0	<10,0
Diltiazem	ng/l	<10,0	<10,0	<10,0	<10,0	<10,0	<10,0	<10,0		<10,0	<10,0	<10,0	<10,0	<10,0	<10,0	<10,0		<10,0	<10,0	<10,0	<10,0	<10,0	<10,0		<10,0	<10,0	<10,0	<10,0	<10,0	<10,0	<10,0		<10,0	<10,0	<10,0	<10,0	<10,0	<10,0
Fexofenadine	ng/l	30.6	58.7	97.5	83.7	73.7	40.8	36.9	60.2714	<10,0	<10,0	<10,0	<10,0	<10,0	<10,0	<10,0		<10,0	<10,0	<10,0	<10,0	<10,0	<10,0		11.9	17.8	29.1	22.4	22.7	34.3	18.5	22.3857	<10,0	<10,0	<10,0	<10,0	<10,0	<10,0
Fluconazole	ng/l	45.9	180	82.7	109	45.5	22.8	65	78.7	<10,0	<10,0	<10,0	<10,0	<10,0	<10,0	<10,0		<10,0	<10,0	<10,0	<10,0	<10,0	<10,0		18	21.3	33.8	16.1	21.8	24.9	13.1	21.2857	<10,0	<10,0	<10,0	<10,0	<10,0	<10,0
Fluoxentine	ng/l	<10,0	<10,0	<10,0	<10,0	<10,0	<10,0	<10,0		<10,0	<10,0	<10,0	<10,0	<10,0	<10,0	<10,0		<10,0	<10,0	<10,0	<10,0	<10,0	<10,0		<10,0	<10,0	<10,0	<10,0	<10,0	<10,0	<10,0		<10,0	<10,0	<10,0	<10,0	<10,0	<10,0
Iomeprol	ng/l	74.1	61.5	151	1980	<50,0	425	<50,0		<50,0	<50,0	<50,0	<50,0	<50,0	187	160		<50,0	<50,0	<50,0	69.8	<50,0	196		269	208	155	244	153	552	445	289.429	<50,0	<50,0	<50,0	<50,0	<50,0	<50,0
Irbesartan	ng/l	45.7	127	85.5	132	134	109	131	109.171	<10,0	<10,0	<10,0	<10,0	<10,0	<10,0	<10,0		<10,0	<10,0	<10,0	<10,0	<10,0	<10,0		18.1	25.8	33.6	19.7	24.2	34.7	21.4	25.3571	<10,0	<10,0	<10,0	10.4	<10,0	<10,0
Ivermectin	ng/l	<50,0	<50,0	<50,0	<50,0	<50,0	<50,0	<50,0		<50,0	<50,0	<50,0	<50,0	<50,0	<50,0	<50,0		<50,0	<50,0	<50,0	<50,0	<50,0	<50,0		<50,0	<50,0	<50,0	<50,0	<50,0	<50,0	<50,0		<50,0	<50,0	<50,0	<50,0	<50,0	<50,0
Lamotrigine	ng/l	446	1340	921	1370	1570	841	861	1049.86	<10,0	<10,0	<10,0	<10,0	<10,0	<10,0	<10,0		<10,0	<10,0	<10,0	11.7	<10,0	43.6		72.1	104	145	109	132	140	94.3	113.771	49.2	38	34.8	43.9	36.6	37.6	40.0167
Lovastatin	ng/l	<10,0	<10,0	<10,0	<10,0	<10,0	<10,0	<10,0		<10,0	<10,0	<10,0	<10,0	<10,0	<10,0	<10,0		<10,0	<10,0	<10,0	<10,0	<10,0	<10,0		<10,0	<10,0	<10,0	<10,0	<10,0	<10,0	<10,0		<10,0	<10,0	<10,0	<10,0	<10,0	<10,0
Memantine	ng/l	<20,0	<20,0	<20,0	<20,0	<20,0	<20,0	<20,0		<20,0	<20,0	<20,0	<20,0	<20,0	<20,0	<20,0		<20,0	<20,0	<20,0	<20,0	<20,0	<20,0		<20,0	<20,0	<20,0	<20,0	<20,0	<20,0	<20,0		<20,0	<20,0	<20,0	<20,0	<20,0	<20,0
Mirtazapine	ng/l	48.4	63.9	43	80.2	76.3	37.6	50.2	57.0857	<10,0	<10,0	<10,0	<10,0	<10,0	<10,0	<10,0		<10,0	<10,0	<10,0	<10,0	<10,0	<10,0		<10,0	<10,0	<10,0	<10,0	<10,0	<10,0	<10,0		<10,0	<10,0	<10,0	<10,0	<10,0	<10,0
Phenazone	ng/l	65.1	34.4	17.8	23.4	28.9	69.5	43.7	40.4	<10,0	<10,0	<10,0	<10,0	<10,0	<10,0	11		<10,0	<10,0	<10,0	<10,0	<10,0	16.7		<10,0	<10,0	12.6	<10,0	<10,0	14.1	10.6		<10,0	<10,0	<10,0	<10,0	<10,0	<10,0
Primidone	ng/l	<10,0	19.9	57.5	70.6	71.9	91.9	107	69.8	19.7	23.8	19.1	20.8	21.7	28.1	34.5		22	15.6	18	15.7	22.4	50.8		26	27.5	38.1	28.6	34.2	49.6	28.3	33.1857	24.7	21.7	25.6	23.2	35.8	37	28
Propranolol	ng/l	<10,0	<10,0	<10,0	<10,0	<10,0	<10,0	<10,0		<10,0	<10,0	<10,0	<10,0	<10,0	<10,0	<10,0		<10,0	<10,0	<10,0	<10,0	<10,0	<10,0		<10,0	<10,0	<10,0	<10,0	<10,0	<10,0	<10,0		<10,0	<10,0	<10,0	<10,0	<10,0	<10,0
Propyphenazone	ng/l	<10,0	<10,0	<10,0	<10,0	<10,0	<10,0	<10,0		<10,0	<10,0	<10,0	<10,0	<10,0	<10,0	<10,0		<10,0	<10,0	<10,0	<10,0	<10,0	<10,0		<10,0	<10,0	<10,0	<10,0	<10,0	<10,0	<10,0		<10,0	<10,0	<10,0	<10,0	<10,0	<10,0
Simvastatin	ng/l	<10,0	<10,0	<10,0	<10,0	<10,0	<10,0	<10,0		<10,0	<10,0	<10,0	<10,0	<10,0	<10,0	<10,0		<10,0	<10,0	<10,0	<10,0	<10,0	<10,0		<10,0	<10,0	<10,0	<10,0	<10,0	<10,0	<10,0		<10,0	<10,0	<10,0	<10,0	<10,0	<10,0
Sotalol	ng/l	104	536	167	189	188	438	401	289	<10,0	<10,0	<10,0	<10,0	<10,0	<10,0	<10,0		<10,0	<10,0	<10,0	<10,0	<10,0	29.2		36.4	30	48.8	49.6	48.8	60.5	45.2	45.6143	<10,0	<10,0	<10,0	<10,0	<10,0	<10,0
Telmisartan	ng/l	3810	10000	7060	7940	10500	6180	5260	7250	<20,0	<20,0	<20,0	<20,0	<20,0	<20,0	<20,0		<20,0	<20,0	<20,0	<20,0	<20,0	<20,0		274	439	597	520	492	720	419	494.429	35.4	29.5	27.4	32.6	31.5	29.1	30.9167
Valsartan	ng/l	32.6	27.2	50.4	23.3	33.2	26.4	72.5	37.9429	<10,0	10	<10,0	10.7	12	<10,0	<10,0		<10,0	<10,0	10.8	<10,0	<10,0	11.3		33.6	20.5	27.2	28.4	27.1	61.9	48.5	35.3143	10.9	12.3	12.7	17.1	16.4	14.9	14.05
Metformin	ng/l	56.1	147	3600	122	114	325	197	651.586	<20,0	<20,0	367	24.2	<20,0	48	<20,0		<20,0	180	<20,0	40.1	162	<20,0		584	413	502	544	551	1020	831	635	<20,0	1260	<20,0	42	<20,0	<20,0
DEET	ng/l	<10,0	11.3	<10,0	<10,0	27.4	<10,0	178		<10,0	12.6	125	39	29.7	15.7	15.3		221	32.4	490	27.8	252	59.5		<10,0	<10,0	<10,0	<10,0	14.6	62	17.8		26	244	19.2	28.1	25.3	30.7	62.2167
OMC	ng/l	<1000	<200	<200	<200	<200	<200	<200		<1000	<200	<200	<200	<200	<200	<200		<200	<200	<200	<200	<200	<200		<1000	<200	<200	<200	<200	<200	<200		<200	<200	<200	<200	<200	<200
PFOS	ng/l	<5,0	<3,00	<3,00	<3,00	4.1	<3,00	<3,00		<5,0	<3,00	<3,00	<3,00	<3,00	<3,00	<3,00		<3,00	<3,00	<3,00	<3,00	<3,00	<3,00		<5,0	<3,00	3.2	<3,00	<3,00	<3,00	<3,00		<3,00	<3,00	<3,00	<3,00	<3,00	<3,00
PFOA	ng/l	<10,0	<5,00	<5,00	<5,00	<5,00	<5,00	<5,00		<10,0	<5,00	<5,00	<5,00	<5,00	<5,00	<5,00		<5,00	<5,00	<5,00	<5,00	<5,00	<5,00		<10,0	<5,00	<5,00	<5,00	<5,00	<5,00	<5,00		<5,00	<5,00	<5,00	<5,00	<5,00	<5,00
Benzotriazol	ng/l	2150	4390	6640	6610	6290	5620	2140	4834.29	<20,0	<20,0	<20,0	<20,0	62.3	167	187		<20,0	<20,0	92.6	196	33.8	420		411	657	459	606	471	838	498	562.857	159	155	173	124	168	155	155.667
Benzotriazol 5-methy	ng/l	199	427	637	556	597	432	474	474.571	<20,0	<20,0	<20,0	<20,0	22.2	32.9	28		<20,0	<20,0	21.2	34.3	<20,0	46		61.4	153	226	183	153	264	150	170.057	99.6	84.4	96.2	73.6	85.8	76	85.9333
Benzotriazol 1-methy	ng/l	68.9	137	169	240	213	70.9	55.5	136.329	<50,0	<50,0	<50,0	<50,0	<50,0	<50,0	<50,0		<50,0	<50,0	<50,0	<50,0	<50,0	<50,0		<50,0	<50,0	<50,0	<50,0	<50,0	<50,0	<50,0		<50,0	<50,0	<50,0	<50,0	<50,0	<50,0
4-formylaminoantipyr	ng/l	122	221	175	261	321	412	513	289.286	24.4	60.6	50.5	45.7	73.7	63.9	68.4		73.9	46.2	78.9	81.1	43.4	93.7		99.5	141	179	151	176	225	137	158.357	73.2	80	86.2	91.2	81	93	84.1
Atorvastatin	ng/l	<10,0	<10,0	<10,0	<10,0	<10,0	<10,0	<10,0		<10,0	<10,0	<10,0	<10,0	<10,0	<10,0	<10,0		<10,0	<10,0	<10,0	<10,0	<10,0	<10,0		<10,0	<10,0	<10,0	<10,0	<10,0	<10,0	<10,0		<10,0	<10,0	<10,0	<10,0	<10,0	<10,0
Butylparaben	ng/l	<10,0	<10,0	<10,0	<10,0	<10,0	<10,0	<10,0		<10,0	<10,0	<10,0	<10,0	<10,0	<10,0	<10,0		<10,0	<10,0	<10,0	<10,0	<10,0	<10,0		<10,0	<10,0	<10,0	<10,0	<10,0	<10,0	<10,0		<10,0	<10,0	<10,0	<10,0	<10,0	<10,0
Climbazole	ng/l	<10,0	39.8	33.7	41.7	47.1	29.3	38.6	38.3667	<10,0	<10,0	<10,0	<10,0	<10,0	<10,0	<10,0		<10,0	<10,0	<10,0	<10,0	<10,0	<10,0		<10,0	<10,0	<10,0	<10,0	<10,0	<10,0	<10,0		<10,0	<10,0	<10,0	<10,0	<10,0	<10,0
Cyclamate	ng/l	<100	<100	1390	<100	<100	<100	<100		<100	<100	689	<100	<100	<100	<100		<100	275	<100	<100	<100	<100		<100	<100	107	<100	<100	294	164		<100	679	<100	<100	<100	<100
Diatrizoate	ng/l	<50,0	<50,0	<50,0	<50,0	<50,0	<50,0	<50,0		<50,0	<50,0	<50,0	<50,0	<50,0	<50,0	<50,0		<50,0	<50,0	<50,0	<50,0	<50,0	<50,0		<50,0	<50,0	<50,0	<50,0	<50,0	<50,0	<50,0		<50,0	<50,0	<50,0	<50,0	<50,0	<50,0
Ethylparaben	ng/l	<10,0	<10,0	<10,0	<10,0	<10,0	<10,0	<10,0		<10,0	<10,0	<10,0	<10,0	<10,0	<10,0	<10,0		<10,0	<10,0	<10,0	<10,0	<10,0	<10,0		<10,0	<10,0	<10,0	<10,0	<10,0	<10,0	<10,0		<10,0	11.3	<10,0	<10,0	<10,0	<10,0
Methylparaben	ng/l	<30,0	<30,0	<30,0	<30,0	<30,0	<30,0	<30,0		<30,0	<30,0	58.3	<30,0	<30,0	<30,0	<30,0		<30,0	<30,0	<30,0	76.4	<30,0	<30,0		<30,0	<30,0	<30,0	<30,0	<30,0	<30,0	<30,0		<30,0	100	<30,0	<30,0	<30,0	<30,0
Norverapamil	ng/l	<10,0	<10,0	<10,0	<10,0	<10,0	<10,0	<10,0		<10,0	<10,0	<10,0	<10,0	<10,0	<10,0	<10,0		<10,0	<10,0	<10,0	<10,0	<10,0	<10,0		<10,0	<10,0	<10,0	<10,0	<10,0	<10,0	<10,0		<10,0	<10,0	<10,0	<10,0	<10,0	<10,0
Propylparaben	ng/l	<20,0	<20,0	<20,0	<20,0	<20,0	<20,0	<20,0		<20,0	<20,0	<20,0	<20,0	<20,0	<20,0	<20,0		<20,0	<20,0	<20,0	23.2	<20,0	<20,0		<20,0	<20,0	<20,0	<20,0	<20,0	<20,0	<20,0		<20,0	23.2	<20,0	<20,0	<20,0	<20,0
Salbutamol	ng/l	<10,0	<10,0	<10,0	<10,0	<10,0	<10,0	<10,0		<10,0	<10,0	<10,0	<10,0	<10,0	<10,0	<10,0		<10,0	<10,0	<10,0	<10,0	<10,0	<10,0		<10,0	<10,0	<10,0	<10,0	<10,0	<10,0	<10,0		<10,0	<10,0	<10,0	<10,0	<10,0	<10,0
Sucralose	ng/l	5170	13000	10500	10100	9610	5510	5260	8450	<1000	<1000	<1000	1480	3550	2650	2490		<1000	<1000	2090	2130	<1000	3090		<1000	2030	2870	1680	2190	2640	1200	2101.67	<1000	<1000	<1000	<1000	<1000	<1000
Valsartan acid	ng/l	644	1430	797	1390	1470	1150	1280	1165.86	33.9	87.6	77.5	135	260	259	243		98.6	70.7	209	259	79.9	324		99	181	290	195	204	227	137	190.429	177	235	229	244	211	207	217.167
Verapamil	ng/l	<10,0	10	11.8	16.4	27.9	<10,0	12.4	15.7	<10,0	<10,0	<10,0	<10,0	<10,0	<10,0	<10,0		<10,0	<10,0	<10,0	<10,0	<10,0	<10,0		<10,0	<10,0	<10,0	<10,0	<10,0	<10,0	<10,0		<10,0	<10,0	<10,0	<10,0	<10,0	<10,0
Amitriptiline	ng/l	<10,0	<10,0	<10,0	<10,0	<10,0	<10,0	<10,0		<10,0	<10,0	<10,0	<10,0	<10,0	<10,0	<10,0		<10,0	<10,0	<10,0	11.9	<10,0	<10,0		<10,0	<10,0	<10,0	<10,0	<10,0	<10,0	<10,0		<10,0	<10,0	<10,0	<10,0	<10,0	<10,0
Disopyramide	ng/l	<10,0	<10,0	<10,0	<10,0	<10,0	<10,0	<10,0		<10,0	<10,0	<10,0	<10,0	<10,0	<10,0	<10,0		<10,0	<10,0	<10,0	<10,0	<10,0	<10,0		<10,0	<10,0	<10,0	<10,0	<10,0	<10,0	<10,0		<10,0	<10,0	<10,0	<10,0	<10,0	<10,0
Eprosartan	ng/l	<10,0	<10,0	<10,0	<10,0	<10,0	<10,0	<10,0		<10,0	<10,0	<10,0	<10,0	<10,0	<10,0	<10,0		<10,0	<10,0	<10,0	<10,0	<10,0	<10,0		<10,0	<10,0	<10,0	<10,0	<10,0	<10,0	<10,0		<10,0	<10,0	<10,0	<10,0	<10,0	<10,0
Lincomycin	ng/l	<10,0	<10,0	<10,0	<10,0	<10,0	<10,0	<10,0		<10,0	<10,0	<10,0	<10,0	<10,0	<10,0	<10,0		<10,0	<10,0	<10,0	<10,0	<10,0	<10,0		<10,0	<10,0	<10,0	<10,0	<10,0	<10,0	<10,0		<10,0	<10,0	<10,0	<10,0	<10,0	<10,0
Losartan	ng/l	<10,0	11	21.3	14.2	20.9	<10,0	19.9	17.46	<10,0	<10,0	<10,0	<10,0	<10,0	<10,0	<10,0		<10,0	<10,0	<10,0	<10,0	<10,0	<10,0		<10,0	<10,0	18.8	13.5	16	26.2	15.8	18.06	<10,0	<10,0	<10,0	<10,0	<10,0	<10,0
Venlafaxine O-desmet	ng/l	395	557	707	1000	934	464	434	641.571	<10,0	<10,0	<10,0	<10,0	<10,0	<10,0	<10,0		<10,0	<10,0	<10,0	<10,0	<10,0	<10,0		66.1	63.3	131	94.2	104	141	81.1	97.2429	<10,0	<10,0	<10,0	<10,0	<10,0	<10,0
4-acetamidoantipyrin	ng/l		451	491	721	910	927	1060	760		34.1	25.1	43.1	105	124	122		40.3	21.2	69.7	97.9	27.1	151			163	220	175	185	242	174	193.167	<10,0	<10,0	<10,0	<10,0	<10,0	<10,0
Cetirizine	ng/l		431	414	429	480	243	322	386.5		<10,0	<10,0	<10,0	<10,0	<10,0	<10,0		<10,0	<10,0	<10,0	<10,0	<10,0	<10,0			40.8	61.4	33.1	44.2	54.3	29.2	43.8333	<10,0	<10,0	<10,0	<10,0	<10,0	<10,0
Sitagliptin	ng/l		300	242	343	315	191	261	275.333		<10,0	<10,0	<10,0	<10,0	<10,0	<10,0		<10,0	<10,0	<10,0	<10,0	<10,0	<10,0			25.2	36.9	36.6	39.5	45.7	35.5	36.5667	<10,0	<10,0	<10,0	<10,0	<10,0	<10,0
Sulfadiazine	ng/l		<10,0	<10,0	<10,0	<10,0	<10,0	<10,0			<10,0	<10,0	<10,0	<10,0	<10,0	<10,0		<10,0	<10,0	<10,0	<10,0	<10,0	<10,0			<10,0	<10,0	<10,0	<10,0	<10,0	<10,0		<10,0	<10,0	<10,0	<10,0	<10,0	<10,0
Torasemide	ng/l		<10,0	<10,0	<10,0	<10,0	<10,0	<10,0			<10,0	<10,0	<10,0	<10,0	<10,0	<10,0		<10,0	<10,0	<10,0	<10,0	<10,0	<10,0			<10,0	<10,0	<10,0	<10,0	<10,0	<10,0		<10,0	<10,0	<10,0	<10,0	<10,0	<10,0

## Sheet: List1
	Date of sampling	2021-11-20	2022-11-07	2022-11-20	2022-11-24	2022-11-30	2022-12-08	2022-12-12	average	nedian		2021-11-20	2022-11-07	2022-11-20	2022-11-24	2022-11-30	2022-12-08	2022-12-12	average	nedian		2021-11-20	2022-11-07	2022-11-20	2022-11-24	2022-11-30	2022-12-08	2022-12-12	average	nedian		2022-11-07	2022-11-20	2022-11-24	2022-11-30	2022-12-08	2022-12-12	average	nedian		2022-11-07	2022-11-20	2022-11-24	2022-11-30	2022-12-08	2022-12-12	average	nedian
									ng/l										ng/l										ng/l									ng/l									ng/l
No	PPCP	WWTP outflow										Morava River										PZ1										CP1									PZ5
1	Carbamazepine	187	353	273	324	376	184	221	274	273		28.7	39.9	48.3	46	43.7	54.7	35.4	42.3857	43.7		16.2	18.9	17.4	22.1	36.2	45.2	49.6	29.3714	22.1		18.4	12.5	25.4	39.3	15.8	56.4	27.9667	21.9		35.3	35.4	33.6	42	38.5	42.2	37.8333	36.95
2	4-formylaminoantipyr	122	221	175	261	321	412	513	289.286	261		99.5	141	179	151	176	225	137	158.357	151		24.4	60.6	50.5	45.7	73.7	63.9	68.4	55.3143	60.6		73.9	46.2	78.9	81.1	43.4	93.7	69.5333	76.4		73.2	80	86.2	91.2	81	93	84.1	83.6
3	Valsartan acid	644	1430	797	1390	1470	1150	1280	1165.86	1280		99	181	290	195	204	227	137	190.429	195		33.9	87.6	77.5	135	260	259	243	156.571	135		98.6	70.7	209	259	79.9	324	173.533	153.8		177	235	229	244	211	207	217.167	220
4	Acesulfame	107	102	146	74.3	119	122	229	128.471	119		174	151	288	217	220	356	288	242	220		221	185	221	234	217	216	206	214.286	217		142	171	200	187	158	205	177.167	179		137	169	164	167	226	208	178.5	168
5	Gabapentin	212	949	710	462	654	680	1160	689.571	680		177	189	204	224	209	288	233	217.714	209		24.4	82.2	54.8	81.5	185	220	240	126.843	82.2		85.4	40.7	126	59.2	50.6	251	102.15	72.3		0	0	0	0	0	0
6	Lamotrigine	446	1340	921	1370	1570	841	861	1049.86	921		72.1	104	145	109	132	140	94.3	113.771	109		0	0	0	0	0	0	0				0	0	0	11.7	0	43.6				49.2	38	34.8	43.9	36.6	37.6	40.0167	37.8
7	Diclofenac	844	1580	1690	1650	3160	1440	1190	1650.57	1580		85.1	106	151	123	140	227	142	139.157	140		0	26	32.9	57.2	191	322	263	127.443	57.2		21.9	0	112	263	31.9	296				26.7	45.6	25.4	33	31.4	28	31.6833	29.7
8	Telmisartan	3810	10000	7060	7940	10500	6180	5260	7250	7060		274	439	597	520	492	720	419	494.429	492		0	0	0	0	0	0	0				0	0	0	0	0	0				35.4	29.5	27.4	32.6	31.5	29.1	30.9167	30.5
9	Valsartan	32.6	27.2	50.4	23.3	33.2	26.4	72.5	37.9429	32.6		33.6	20.5	27.2	28.4	27.1	61.9	48.5	35.3143	28.4		0	10	0	10.7	12	0	0				0	0	10.8	0	0	11.3				10.9	12.3	12.7	17.1	16.4	14.9	14.05	13.8
10	Tramadol	851	2010	1380	2090	2870	1240	1270	1673	1380		79.3	103	153	103	94.9	140	90.7	109.129	103		0	0	0	0	0	0	0				0	0	0	0	0	0				37.7	31.2	31.1	34.5	29.9	29.5	32.3167	31.15
11	Oxypurinol	7820	10200	13400	17100	21800	14700	12300	13902.9	13400		1420	729	2350	1960	2270	3050	1600	1911.29	1960		0	0	0	0	299	811	1070				0	0	338	849	69.2	1690	491.033	203.6		270	540	438	328	427	366	394.833	396.5
12	Benzotriazol	2150	4390	6640	6610	6290	5620	2140	4834.29	5620		411	657	459	606	471	838	498	562.857	498		0	0	0	0	62.3	167	187				0	0	92.6	196	33.8	420	123.733	63.2		159	155	173	124	168	155	155.667	157
13	Benzotriazol 5-methy	199	427	637	556	597	432	474	474.571	474		61.4	153	226	183	153	264	150	170.057	153		0	0	0	0	22.2	32.9	28				0	0	21.2	34.3	0	46				99.6	84.4	96.2	73.6	85.8	76	85.9333	85.1
14	Sulfapyridin	148	303	192	269	262	319	356	264.143	269		14	20.8	24.4	19.5	24.6	38.4	22.4	23.4429	22.4		0	10.6	0	0	26.4	51.8	55.5				11.3	0	22.4	33.3	11.4	68.4	24.4667	16.9		19.4	0	11.9	13.2	15.7	18.4	13.1	14.45
15	Hydrochlorothiazide	981	1600	1360	1770	2120	1350	1690	1553	1600		92.4	96.3	141	99.1	104	176	108	116.686	104		0	0	0	0	102	174	181				0	0	68.3	120	0	198				0	0	0	0	0	0
16	Metoprolol	573	789	810	1020	1120	568	675	793.571	789		51.2	41.5	67.2	51	59.1	87.5	54.2	58.8143	54.2		0	0	0	0	0	0	0				0	0	0	0	0	0				0	21.8	0	0	0	0
17	Clarithromycin	208	34	211	281	291	385	710	302.857	281		41.5	23.9	33.9	29	46.7	65.8	56.6	42.4857	41.5		0	0	0	0	0	0	0				0	0	0	0	0	0				0	0	0	0	0	0
18	Acebutolol	65.5	235	191	209	200	131	152	169.071	191		12.2	12.1	17.8	11.9	13.7	19.4	13.3	14.3429	13.3		0	0	0	0	0	0	0				0	0	0	0	0	0				0	0	0	0	0	0
19	Venlafaxine	129	225	215	264	270	202	247	221.714	225		20.1	20.3	27	18.6	22.4	32.1	20.7	23.0286	20.7		0	0	0	0	0	0	0				0	0	0	0	0	0				0	0	0	0	0	0
20	Sulfamethoxazol	543	520	750	1050	1080	1120	1710	967.571	1050		36.6	47	70.5	55.1	66.1	81.1	57	59.0571	57												0	0	0	0	0	0				0	0	0	0	0	0
21	Celiprolol	147	284	308	365	382	179	209	267.714	284		12.3	12.8	13.3	15.5	14.8	16	15.1	14.2571	14.8		0	0	0	0	0	0	0				0	0	0	0	0	0				0	0	0	0	0	0
22	Fexofenadine	30.6	58.7	97.5	83.7	73.7	40.8	36.9	60.2714	58.7		11.9	17.8	29.1	22.4	22.7	34.3	18.5	22.3857	22.4		0	0	0	0	0	0	0				0	0	0	0	0	0				0	0	0	0	0	0
23	Fluconazole	45.9	180	82.7	109	45.5	22.8	65	78.7	65		18	21.3	33.8	16.1	21.8	24.9	13.1	21.2857	21.3		0	0	0	0	0	0	0				0	0	0	0	0	0				0	0	0	0	0	0
24	Irbesartan	45.7	127	85.5	132	134	109	131	109.171	127		18.1	25.8	33.6	19.7	24.2	34.7	21.4	25.3571	24.2		0	0	0	0	0	0	0				0	0	0	0	0	0				0	0	0	10.4	0	0
25	Sotalol	104	536	167	189	188	438	401	289	189		36.4	30	48.8	49.6	48.8	60.5	45.2	45.6143	48.8		0	0	0	0	0	0	0				0	0	0	0	0	29.2				0	0	0	0	0	0
26	Metformin	56.1	147	3600	122	114	325	197	651.586	147		584	413	502	544	551	1020	831	635	551		0	0	367	24.2	0	48	0				0	180	0	40.1	162	0				0	1260	0	42	0	0
27	Venlafaxine O-desmet	395	557	707	1000	934	464	434	641.571	557		66.1	63.3	131	94.2	104	141	81.1	97.2429	94.2		0	0	0	0	0	0	0				0	0	0	0	0	0				0	0	0	0	0	0
28	Sucralose	5170	13000	10500	10100	9610	5510	5260	8450	9610		0	2030	2870	1680	2190	2640	1200	1801.43	2030		0	0	0	1480	3550	2650	2490	1452.86	1480		0	0	2090	2130	0	3090				0	0	0	0	0	0
29	Bisoprolol	102	136	138	128	158	142	202	143.714	138		12.1	0	13.3	10.2	13.2	23.7	15.3	12.5429	13.2		0	0	0	0	0	0	0				0	0	0	0	0	0				0	0	0	0	0	0
30	Diclofenac-4-hydroxy	483	1010	572	639	635	743	894	710.857	639		0	0	34.6	0	25.2	54	34.5	21.1857	25.2		0	0	0	23.7	66.1	140	141	52.9714	23.7		0	0	41.4	68.8	0	146				0	0	0	0	0	0
31	Trimetoprim	136	139	178	203	214	258	427	222.143	203		0	0	13.1	0	10.3	19.2	10.8	7.62857	10.3		0	0	0	0	0	0	0				0	0	0	0	0	0				0	0	0	0	0	0
32	Atenolol	38.5	36.4	29.8	27.2	29.5	49.2	70.5	40.1571	36.4		0	0	0	0	0	10	10.2				0	0	0	0	0	0	0				0	0	0	0	0	0				0	0	0	0	0	0
33	Phenazone	65.1	34.4	17.8	23.4	28.9	69.5	43.7	40.4	34.4		0	0	12.6	0	0	14.1	10.6				0	0	0	0	0	0	11				0	0	0	0	0	16.7				0	0	0	0	0	0
34	Furosemide	542	847	786	559	763	788	1240	789.286	786		0	0	0	0	0	127	92.8				0	0	0	0	97.6	121	128				0	0	62	62	0	142				0	0	0	0	0	0
35	Azithromycin	240	544	587	975	1680	653	987	809.429	653		0	0	0	0	0	0	0				0	0	0	0	0	0	0				0	0	0	0	0	0				0	0	0	0	0	0
36	Carbamazepine-E	19.2	33.1	22.6	27.1	29.9	23.4	25.3	25.8	25.3		0	0	0	0	0	0	0				0	0	0	0	0	0	0				0	0	0	0	0	0				0	0	0	0	0	0
37	Carbamazepine-DHH	22.9	21.3	31.2	33.6	40.8	38.3	42	32.8714	33.6		0	0	0	0	0	0	0				0	0	0	0	0	0	0				0	0	0	0	0	0				0	0	0	0	0	0
38	Oxcarbazepine	57.8	51.7	74.3	92.1	80.5	83.2	97.2	76.6857	80.5		0	0	0	0	0	0	0				0	0	0	0	0	0	0				0	0	0	0	0	0				0	0	0	0	0	0
39	Sertraline	19.8	25.4	17.8	24.1	22.7	23.3	22.9	22.2857	22.9		0	0	0	0	0	0	0				0	0	0	0	0	0	0				0	0	0	0	0	0				0	0	0	0	0	0
40	Carbamazepine-2-hydr.	28.7	71.1	46.4	58.7	68.6	50.1	62.6	55.1714	58.7		0	0	0	0	0	0	0				0	0	0	0	0	0	0				0	0	0	0	0	0				0	0	0	0	0	0
41	Citalopram	68.5	147	109	134	142	101	122	117.643	122		0	0	0	0	0	0	0				0	0	0	0	0	0	0				0	0	0	0	0	0				0	0	0	0	0	0
42	Mirtazapine	48.4	63.9	43	80.2	76.3	37.6	50.2	57.0857	50.2		0	0	0	0	0	0	0				0	0	0	0	0	0	0				0	0	0	0	0	0				0	0	0	0	0	0
43	Benzotriazol 1-methy	68.9	137	169	240	213	70.9	55.5	136.329	137		0	0	0	0	0	0	0				0	0	0	0	0	0	0				0	0	0	0	0	0				0	0	0	0	0	0
44	Ketoprofen	20.1	25.6	45	41.5	46.1	36.5	85.4	42.8857	41.5		0	0	0	0	0	0	0				0	0	13.7	0	0	0	0				0	0	0	49.8	0	0				0	14.8	0	0	0	0
45	Sulfanilamide	50.3	285	56	81	68.7	233	232	143.714	81		0	0	0	0	0	0	0				51.5	0	0	65.3	111	96.1	97.7	60.2286	65.3		0	0	69.2	55.9	0	102				69.9	65.8	98.3	96.9	143	138	101.983	97.6
46	Iopromide	52.3	70.9	313	240	2670	0	93.5	491.386	93.5		237	520	638	182	616	1400	504	585.286	520		0	0	0	0	80.7	74.9	77.6				0	0	78.3	61.8	0	92.8				0	0	0	0	0	0
47	4-acetamidoantipyrin		451	491	721	910	927	1060	760	815.5			163	220	175	185	242	174	193.167	180			34.1	25.1	43.1	105	124	122	75.55	74.05		40.3	21.2	69.7	97.9	27.1	151	67.8667	55		0	0	0	0	0	0
48	Cetirizine		431	414	429	480	243	322	386.5	421.5			40.8	61.4	33.1	44.2	54.3	29.2	43.8333	42.5			0	0	0	0	0	0				0	0	0	0	0	0				0	0	0	0	0	0
49	Sitagliptin		300	242	343	315	191	261	275.333	280.5			25.2	36.9	36.6	39.5	45.7	35.5	36.5667	36.75			0	0	0	0	0	0				0	0	0	0	0	0				0	0	0	0	0	0
50	Primidone	0	19.9	57.5	70.6	71.9	91.9	107	59.8286	70.6		26	27.5	38.1	28.6	34.2	49.6	28.3	33.1857	28.6		19.7	23.8	19.1	20.8	21.7	28.1	34.5	23.9571	21.7		22	15.6	18	15.7	22.4	50.8	24.0833	20		24.7	21.7	25.6	23.2	35.8	37	28	25.15
51	Climbazole	0	39.8	33.7	41.7	47.1	29.3	38.6	32.8857	38.6		0	0	0	0	0	0	0				0	0	0	0	0	0	0				0	0	0	0	0	0				0	0	0	0	0	0
52	Clindamycin	0	37.1	21.5	53.1	57.6	44	36.4	35.6714	37.1		0	0	0	0	0	11.8	0				0	0	0	0	0	0	0				0	0	0	0	0	0				0	0	0	0	0	0
53	Naproxene-O-desmeth.	0	0	49.2	22.8	60.3	42	45	31.3286	42		0	0	0	0	0	0	0				0	0	0	0	0	0	0				0	0	0	0	0	0				0	0	0	0	0	0
54	Iomeprol	74.1	61.5	151	1980	0	425	0	384.514	74.1		269	208	155	244	153	552	445	289.429	244		0	0	0	0	0	187	160				0	0	0	69.8	0	196				0	0	0	0	0	0
55	Verapamil	0	10	11.8	16.4	27.9	0	12.4	11.2143	11.8		0	0	0	0	0	0	0				0	0	0	0	0	0	0				0	0	0	0	0	0				0	0	0	0	0	0
56	Losartan	0	11	21.3	14.2	20.9	0	19.9	12.4714	14.2		0	0	18.8	13.5	16	26.2	15.8	12.9	15.8		0	0	0	0	0	0	0				0	0	0	0	0	0				0	0	0	0	0	0
57	Warfarin	0	10.1	10	10.3	12.3	0	10.4	7.58571	10.1		0	26.5	11.7	0	0	37.9	12.3				0	0	0	0	0	0	0				0	0	0	0	0	0				0	0	0	0	0	0
58	Erythromycin	0	0	10.5	0	0	0	11.7				0	0	0	0	0	0	0														0	0	0	0	0	0				0	0	0	0	0	0
59	Cyclamate	0	0	1390	0	0	0	0				0	0	107	0	0	294	164				0	0	689	0	0	0	0				0	275	0	0	0	0				0	679	0	0	0	0
60	DEET	0	11.3	0	0	27.4	0	178				0	0	0	0	14.6	62	17.8				0	12.6	125	39	29.7	15.7	15.3	33.9	15.7		221	32.4	490	27.8	252	59.5	180.45	140.25		26	244	19.2	28.1	25.3	30.7	62.2167	27.05
61	PFOS	0	0	0	0	4.1	0	0				0	0	3.2	0	0	0	0				0	0	0	0	0	0	0				0	0	0	0	0	0				0	0	0	0	0	0
62	Cyclophosphamide	21.4	13.6	0	0	34.9	0	0				0	0	0	0	0	0	0				0	0	0	0	0	0	0				0	0	0	0	0	0				0	0	0	0	0	0
63	Paraxanthine	0	0	115	0	0	0	0				0	0	0	0	0	241	115				0	0	170	0	0	0	0				0	0	0	544	0	0				0	290	0	0	0	0
64	Ibuprofen	0	22.5	57.2	27	0	0	0				32	252	51.2	28.4	22.5	137	46	81.3	46		0	0	40.5	0	0	0	0				0	20.6	0	51.6	0	0				0	95.9	0	0	0	0
65	Naproxene	0	0	54.4	0	0	69	56.7				0	0	0	0	0	0	0				0	0	0	0	0	0	0				0	0	0	0	0	0				0	0	0	0	0	0
66	Saccharin	0	0	162	0	0	0	56.5				70.8	0	159	142	122	323	195	144.543	142		0	0	172	0	0	0	0				0	54.2	0	190	0	0				0	164	0	0	0	0
67	Paracetamol	0	0	28	0	16.2	0	16.4				20.9	0	18.7	17.5	12.2	40.7	61.6	24.5143	18.7		0	0	17.8	0	0	0	0				0	0	0	20.8	0	0				0	36.4	0	0	0	0
68	Iohexol	0	0	0	0	0	0	0				70.4	0	0	0	80.4	143	57.1	50.1286	57.1		0	0	0	0	0	0	0				0	0	0	0	0	0				0	0	0	0	0	0
69	Ibuprofen-2-hydroxy	0	0	0	0	0	0	0				90.3	98.7	68.8	110	65.7	318	157	129.786	98.7		0	0	0	0	0	0	0				0	0	0	0	0	0				0	0	0	0	0	0
70	Ibuprofen-carboxy	0	0	0	0	0	0	0				27.6	0	0	30.5	29.7	59.1	62.1	29.8571	29.7		0	0	0	0	0	0	0				0	0	0	0	0	0				0	0	0	0	0	0
71	Alfuzosin	0	0	0	0	0	0	0				37.8	13.9	16.4	0	13.2	36.6	15.9	19.1143	15.9		0	0	0	0	0	0	0				0	0	0	0	0	0				0	0	0	0	0	0
72	Sulfamethazin	0	0	0	0	0	0	0				0	0	0	0	0	0	0				23.7	28.2	29.5	33.9	45.1	29.9	28.6	31.2714			36.2	24.1	37.2	39	28.2	42.5	34.5333			25.9	32.4	34.6	43	42.4	45.7	37.3333
73	Caffein	0	0	0	0	0	0	0				0	0	0	0	0	201	145				0	0	417	0	0	0	0				0	0	0	836	0	0				0	485	0	0	0	0
74	Diatrizoate	0	0	0	0	0	0	0				0	0	0	0	0	0	0				0	0	0	0	0	0	0				0	0	0	0	0	0				0	0	0	0	0	0
75	Methylparaben	0	0	0	0	0	0	0				0	0	0	0	0	0	0				0	0	58.3	0	0	0	0				0	0	0	76.4	0	0				0	100	0	0	0	0
76	Bisfenol S	0	0	0	27.3	0	0	0				0	0	0	0	0	0	0				0	0	46.9	0	0	0	0				0	0	0	65.2	0	0				0	104	0	0	0	0
77	Cotinine	0	0	0	0	0	0	25.3				0	0	0	0	0	0	0				0	0	0	0	0	0	0				0	0	0	34.8	0	0				0	0	0	0	0	0
78	Ethylparaben	0	0	0	0	0	0	0				0	0	0	0	0	0	0				0	0	0	0	0	0	0				0	0	0	0	0	0				0	11.3	0	0	0	0
79	Propylparaben	0	0	0	0	0	0	0				0	0	0	0	0	0	0				0	0	0	0	0	0	0				0	0	0	23.2	0	0				0	23.2	0	0	0	0
80	Amitriptiline	0	0	0	0	0	0	0				0	0	0	0	0	0	0				0	0	0	0	0	0	0				0	0	0	11.9	0	0				0	0	0	0	0	0
81	Norverapamil	0	0	0	0	0	0	0				0	0	0	0	0	0	0				0	0	0	0	0	0	0				0	0	0	0	0	0				0	0	0	0	0	0
82	Gemfibrozil	0	0	0	0	0	0	0				0	0	0	0	0	0	0				0	0	0	0	0	0	0				0	0	0	0	0	0				0	0	0	0	0	0
83	Sulfamerazine	0	0	0	0	0	0	0				0	0	0	0	0	0	0				0	0	0	0	0	0	0				0	0	0	0	0	0				0	0	0	0	0	0
84	Triclocarban	0	0	0	0	0	0	0				0	0	0	0	0	0	0				0	0	0	0	0	0	0				0	0	0	0	0	0				0	0	0	0	0	0
85	Triclosan	0	0	0	0	0	0	0				0	0	0	0	0	0	0				0	0	0	0	0	0	0				0	0	0	0	0	0				0	0	0	0	0	0
86	Karbamazepin-DH	0	0	0	0	0	0	0				0	0	0	0	0	0	0				0	0	0	0	0	0	0				0	0	0	0	0	0				0	0	0	0	0	0
87	Chloramphenicol	0	0	0	0	0	0	0				0	0	0	0	0	0	0				0	0	0	0	0	0	0				0	0	0	0	0	0				0	0	0	0	0	0
88	Bisfenol B	0	0	0	0	0	0	0				0	0	0	0	0	0	0				0	0	0	0	0	0	0				0	0	0	0	0	0				0	0	0	0	0	0
89	Fluoxentine	0	0	0	0	0	0	0
90	Tiamulin	0	0	0	0	0	0	0				0	0	0	0	0	0	0				0	0	0	0	0	0	0				0	0	0	0	0	0				0	0	0	0	0	0
91	Lovastatin	0	0	0	0	0	0	0				0	0	0	0	0	0	0				0	0	0	0	0	0	0				0	0	0	0	0	0				0	0	0	0	0	0
92	Memantine	0	0	0	0	0	0	0				0	0	0	0	0	0	0				0	0	0	0	0	0	0				0	0	0	0	0	0				0	0	0	0	0	0
93	Iopamidol	0	0	0	0	0	0	0				0	0	0	0	0	0	0				0	0	0	0	0	0	0				0	0	0	0	0	0				0	0	0	0	0	0
94	Eprosartan	0	0	0	0	0	0	0				0	0	0	0	0	0	0				0	0	0	0	0	0	0				0	0	0	0	0	0				0	0	0	0	0	0
95	Lincomycin	0	0	0	0	0	0	0				0	0	0	0	0	0	0				0	0	0	0	0	0	0				0	0	0	0	0	0				0	0	0	0	0	0
96	Clofibric acid	0	0	0	0	0	0	0				0	0	0	0	0	0	0				0	0	0	0	0	0	0				0	0	0	0	0	0				0	0	0	0	0	0
97	Propranolol	0	0	0	0	0	0	0				0	0	0	0	0	0	0				0	0	0	0	0	0	0				0	0	0	0	0	0				0	0	0	0	0	0
98	Propyphenazone	0	0	0	0	0	0	0				0	0	0	0	0	0	0				0	0	0	0	0	0	0				0	0	0	0	0	0				0	0	0	0	0	0
99	Simvastatin	0	0	0	0	0	0	0				0	0	0	0	0	0	0				0	0	0	0	0	0	0				0	0	0	0	0	0				0	0	0	0	0	0
100	PFOA	0	0	0	0	0	0	0				0	0	0	0	0	0	0				0	0	0	0	0	0	0				0	0	0	0	0	0				0	0	0	0	0	0
101	OMC	0	0	0	0	0	0	0				0	0	0	0	0	0	0				0	0	0	0	0	0	0				0	0	0	0	0	0				0	0	0	0	0	0
102	Bezafibrate	0	0	0	0	0	0	0				0	0	0	0	0	0	0				0	0	0	0	0	0	0				0	0	0	0	0	0				0	0	0	0	0	0
103	Atorvastatin	0	0	0	0	0	0	0				0	0	0	0	0	0	0				0	0	0	0	0	0	0				0	0	0	0	0	0				0	0	0	0	0	0
104	Butylparaben	0	0	0	0	0	0	0				0	0	0	0	0	0	0				0	0	0	0	0	0	0				0	0	0	0	0	0				0	0	0	0	0	0
105	Salbutamol	0	0	0	0	0	0	0				0	0	0	0	0	0	0				0	0	0	0	0	0	0				0	0	0	0	0	0				0	0	0	0	0	0
106	Ivermectin	0	0	0	0	0	0	0				0	0	0	0	0	0	0				0	0	0	0	0	0	0				0	0	0	0	0	0				0	0	0	0	0	0
107	Fluoxentine	0	0	0	0	0	0	0				0	0	0	0	0	0	0				0	0	0	0	0	0	0				0	0	0	0	0	0				0	0	0	0	0	0
108	Diltiazem	0	0	0	0	0	0	0				0	0	0	0	0	0	0				0	0	0	0	0	0	0				0	0	0	0	0	0				0	0	0	0	0	0
109	Roxithromycin	0	0	0	0	0	0	0				0	0	0	0	0	0	0				0	0	0	0	0	0	0				0	0	0	0	0	0				0	0	0	0	0	0

## Sheet: ENG
Date of sampling	2021-11-20	2022-11-07	2022-11-20	2022-11-24	2022-11-30	2022-12-08	2022-12-12		2021-11-20	2022-11-07	2022-11-20	2022-11-24	2022-11-30	2022-12-08	2022-12-12		2021-11-20	2022-11-07	2022-11-20	2022-11-24	2022-11-30	2022-12-08	2022-12-12		2022-11-07	2022-11-20	2022-11-24	2022-11-30	2022-12-08	2022-12-12		2022-11-07	2022-11-20	2022-11-24	2022-11-30	2022-12-08	2022-12-12
PPCP substance	WWTP outflow								Morava River								PZ1								CP1							PZ5
Carbamazepine	187	353	273	324	376	184	221		28.7	39.9	48.3	46	43.7	54.7	35.4		16.2	18.9	17.4	22.1	36.2	45.2	49.6		18.4	12.5	25.4	39.3	15.8	56.4		35.3	35.4	33.6	42	38.5	42.2
4-formylaminoantipyr	122	221	175	261	321	412	513		99.5	141	179	151	176	225	137		24.4	60.6	50.5	45.7	73.7	63.9	68.4		73.9	46.2	78.9	81.1	43.4	93.7		73.2	80	86.2	91.2	81	93
Valsartan acid	644	1430	797	1390	1470	1150	1280		99	181	290	195	204	227	137		33.9	87.6	77.5	135	260	259	243		98.6	70.7	209	259	79.9	324		177	235	229	244	211	207
Acesulfame	107	102	146	74.3	119	122	229		174	151	288	217	220	356	288		221	185	221	234	217	216	206		142	171	200	187	158	205		137	169	164	167	226	208
Gabapentin	212	949	710	462	654	680	1160		177	189	204	224	209	288	233		24.4	82.2	54.8	81.5	185	220	240		85.4	40.7	126	59.2	50.6	251		0	0	0	0	0	0
Lamotrigine	446	1340	921	1370	1570	841	861		72.1	104	145	109	132	140	94.3		0	0	0	0	0	0	0		0	0	0	11.7	0	43.6		49.2	38	34.8	43.9	36.6	37.6
Diclofenac	844	1580	1690	1650	3160	1440	1190		85.1	106	151	123	140	227	142		0	26	32.9	57.2	191	322	263		21.9	0	112	263	31.9	296		26.7	45.6	25.4	33	31.4	28
Telmisartan	3810	10000	7060	7940	10500	6180	5260		274	439	597	520	492	720	419		0	0	0	0	0	0	0		0	0	0	0	0	0		35.4	29.5	27.4	32.6	31.5	29.1
Valsartan	32.6	27.2	50.4	23.3	33.2	26.4	72.5		33.6	20.5	27.2	28.4	27.1	61.9	48.5		0	10	0	10.7	12	0	0		0	0	10.8	0	0	11.3		10.9	12.3	12.7	17.1	16.4	14.9
Tramadol	851	2010	1380	2090	2870	1240	1270		79.3	103	153	103	94.9	140	90.7		0	0	0	0	0	0	0		0	0	0	0	0	0		37.7	31.2	31.1	34.5	29.9	29.5
Oxypurinol	7820	10200	13400	17100	21800	14700	12300		1420	729	2350	1960	2270	3050	1600		0	0	0	0	299	811	1070		0	0	338	849	69.2	1690		270	540	438	328	427	366
Benzotriazol	2150	4390	6640	6610	6290	5620	2140		411	657	459	606	471	838	498		0	0	0	0	62.3	167	187		0	0	92.6	196	33.8	420		159	155	173	124	168	155
Benzotriazol 5-methy	199	427	637	556	597	432	474		61.4	153	226	183	153	264	150		0	0	0	0	22.2	32.9	28		0	0	21.2	34.3	0	46		99.6	84.4	96.2	73.6	85.8	76
Sulfapyridin	148	303	192	269	262	319	356		14	20.8	24.4	19.5	24.6	38.4	22.4		0	10.6	0	0	26.4	51.8	55.5		11.3	0	22.4	33.3	11.4	68.4		19.4	0	11.9	13.2	15.7	18.4
Hydrochlorothiazide	981	1600	1360	1770	2120	1350	1690		92.4	96.3	141	99.1	104	176	108		0	0	0	0	102	174	181		0	0	68.3	120	0	198		0	0	0	0	0	0
Metoprolol	573	789	810	1020	1120	568	675		51.2	41.5	67.2	51	59.1	87.5	54.2		0	0	0	0	0	0	0		0	0	0	0	0	0		0	21.8	0	0	0	0
Clarithromycin	208	34	211	281	291	385	710		41.5	23.9	33.9	29	46.7	65.8	56.6		0	0	0	0	0	0	0		0	0	0	0	0	0		0	0	0	0	0	0
Acebutolol	65.5	235	191	209	200	131	152		12.2	12.1	17.8	11.9	13.7	19.4	13.3		0	0	0	0	0	0	0		0	0	0	0	0	0		0	0	0	0	0	0
Venlafaxine	129	225	215	264	270	202	247		20.1	20.3	27	18.6	22.4	32.1	20.7		0	0	0	0	0	0	0		0	0	0	0	0	0		0	0	0	0	0	0
Sulfamethoxazol	543	520	750	1050	1080	1120	1710		36.6	47	70.5	55.1	66.1	81.1	57										0	0	0	0	0	0		0	0	0	0	0	0
Celiprolol	147	284	308	365	382	179	209		12.3	12.8	13.3	15.5	14.8	16	15.1		0	0	0	0	0	0	0		0	0	0	0	0	0		0	0	0	0	0	0
Fexofenadine	30.6	58.7	97.5	83.7	73.7	40.8	36.9		11.9	17.8	29.1	22.4	22.7	34.3	18.5		0	0	0	0	0	0	0		0	0	0	0	0	0		0	0	0	0	0	0
Fluconazole	45.9	180	82.7	109	45.5	22.8	65		18	21.3	33.8	16.1	21.8	24.9	13.1		0	0	0	0	0	0	0		0	0	0	0	0	0		0	0	0	0	0	0
Irbesartan	45.7	127	85.5	132	134	109	131		18.1	25.8	33.6	19.7	24.2	34.7	21.4		0	0	0	0	0	0	0		0	0	0	0	0	0		0	0	0	10.4	0	0
Sotalol	104	536	167	189	188	438	401		36.4	30	48.8	49.6	48.8	60.5	45.2		0	0	0	0	0	0	0		0	0	0	0	0	29.2		0	0	0	0	0	0
Metformin	56.1	147	3600	122	114	325	197		584	413	502	544	551	1020	831		0	0	367	24.2	0	48	0		0	180	0	40.1	162	0		0	1260	0	42	0	0
Venlafaxine O-desmet	395	557	707	1000	934	464	434		66.1	63.3	131	94.2	104	141	81.1		0	0	0	0	0	0	0		0	0	0	0	0	0		0	0	0	0	0	0
Sucralose	5170	13000	10500	10100	9610	5510	5260		0	2030	2870	1680	2190	2640	1200		0	0	0	1480	3550	2650	2490		0	0	2090	2130	0	3090		0	0	0	0	0	0
Bisoprolol	102	136	138	128	158	142	202		12.1	0	13.3	10.2	13.2	23.7	15.3		0	0	0	0	0	0	0		0	0	0	0	0	0		0	0	0	0	0	0
Diclofenac-4-hydroxy	483	1010	572	639	635	743	894		0	0	34.6	0	25.2	54	34.5		0	0	0	23.7	66.1	140	141		0	0	41.4	68.8	0	146		0	0	0	0	0	0
Trimetoprim	136	139	178	203	214	258	427		0	0	13.1	0	10.3	19.2	10.8		0	0	0	0	0	0	0		0	0	0	0	0	0		0	0	0	0	0	0
Atenolol	38.5	36.4	29.8	27.2	29.5	49.2	70.5		0	0	0	0	0	10	10.2		0	0	0	0	0	0	0		0	0	0	0	0	0		0	0	0	0	0	0
Phenazone	65.1	34.4	17.8	23.4	28.9	69.5	43.7		0	0	12.6	0	0	14.1	10.6		0	0	0	0	0	0	11		0	0	0	0	0	16.7		0	0	0	0	0	0
Furosemide	542	847	786	559	763	788	1240		0	0	0	0	0	127	92.8		0	0	0	0	97.6	121	128		0	0	62	62	0	142		0	0	0	0	0	0
Azithromycin	240	544	587	975	1680	653	987		0	0	0	0	0	0	0		0	0	0	0	0	0	0		0	0	0	0	0	0		0	0	0	0	0	0
Carbamazepine-E	19.2	33.1	22.6	27.1	29.9	23.4	25.3		0	0	0	0	0	0	0		0	0	0	0	0	0	0		0	0	0	0	0	0		0	0	0	0	0	0
Carbamazepine-DHH	22.9	21.3	31.2	33.6	40.8	38.3	42		0	0	0	0	0	0	0		0	0	0	0	0	0	0		0	0	0	0	0	0		0	0	0	0	0	0
Oxcarbazepine	57.8	51.7	74.3	92.1	80.5	83.2	97.2		0	0	0	0	0	0	0		0	0	0	0	0	0	0		0	0	0	0	0	0		0	0	0	0	0	0
Sertraline	19.8	25.4	17.8	24.1	22.7	23.3	22.9		0	0	0	0	0	0	0		0	0	0	0	0	0	0		0	0	0	0	0	0		0	0	0	0	0	0
Carbamazepine-2-hydr.	28.7	71.1	46.4	58.7	68.6	50.1	62.6		0	0	0	0	0	0	0		0	0	0	0	0	0	0		0	0	0	0	0	0		0	0	0	0	0	0
Citalopram	68.5	147	109	134	142	101	122		0	0	0	0	0	0	0		0	0	0	0	0	0	0		0	0	0	0	0	0		0	0	0	0	0	0
Mirtazapine	48.4	63.9	43	80.2	76.3	37.6	50.2		0	0	0	0	0	0	0		0	0	0	0	0	0	0		0	0	0	0	0	0		0	0	0	0	0	0
Benzotriazol 1-methy	68.9	137	169	240	213	70.9	55.5		0	0	0	0	0	0	0		0	0	0	0	0	0	0		0	0	0	0	0	0		0	0	0	0	0	0
Ketoprofen	20.1	25.6	45	41.5	46.1	36.5	85.4		0	0	0	0	0	0	0		0	0	13.7	0	0	0	0		0	0	0	49.8	0	0		0	14.8	0	0	0	0
Sulfanilamide	50.3	285	56	81	68.7	233	232		0	0	0	0	0	0	0		51.5	0	0	65.3	111	96.1	97.7		0	0	69.2	55.9	0	102		69.9	65.8	98.3	96.9	143	138
Iopromide	52.3	70.9	313	240	2670	0	93.5		237	520	638	182	616	1400	504		0	0	0	0	80.7	74.9	77.6		0	0	78.3	61.8	0	92.8		0	0	0	0	0	0
4-acetamidoantipyrin		451	491	721	910	927	1060			163	220	175	185	242	174			34.1	25.1	43.1	105	124	122		40.3	21.2	69.7	97.9	27.1	151		0	0	0	0	0	0
Cetirizine		431	414	429	480	243	322			40.8	61.4	33.1	44.2	54.3	29.2			0	0	0	0	0	0		0	0	0	0	0	0		0	0	0	0	0	0
Sitagliptin		300	242	343	315	191	261			25.2	36.9	36.6	39.5	45.7	35.5			0	0	0	0	0	0		0	0	0	0	0	0		0	0	0	0	0	0
Primidone	0	19.9	57.5	70.6	71.9	91.9	107		26	27.5	38.1	28.6	34.2	49.6	28.3		19.7	23.8	19.1	20.8	21.7	28.1	34.5		22	15.6	18	15.7	22.4	50.8		24.7	21.7	25.6	23.2	35.8	37
Climbazole	0	39.8	33.7	41.7	47.1	29.3	38.6		0	0	0	0	0	0	0		0	0	0	0	0	0	0		0	0	0	0	0	0		0	0	0	0	0	0
Clindamycin	0	37.1	21.5	53.1	57.6	44	36.4		0	0	0	0	0	11.8	0		0	0	0	0	0	0	0		0	0	0	0	0	0		0	0	0	0	0	0
Naproxene-O-desmeth.	0	0	49.2	22.8	60.3	42	45		0	0	0	0	0	0	0		0	0	0	0	0	0	0		0	0	0	0	0	0		0	0	0	0	0	0
Iomeprol	74.1	61.5	151	1980	0	425	0		269	208	155	244	153	552	445		0	0	0	0	0	187	160		0	0	0	69.8	0	196		0	0	0	0	0	0
Verapamil	0	10	11.8	16.4	27.9	0	12.4		0	0	0	0	0	0	0		0	0	0	0	0	0	0		0	0	0	0	0	0		0	0	0	0	0	0
Losartan	0	11	21.3	14.2	20.9	0	19.9		0	0	18.8	13.5	16	26.2	15.8		0	0	0	0	0	0	0		0	0	0	0	0	0		0	0	0	0	0	0
Warfarin	0	10.1	10	10.3	12.3	0	10.4		0	26.5	11.7	0	0	37.9	12.3		0	0	0	0	0	0	0		0	0	0	0	0	0		0	0	0	0	0	0
Erythromycin	0	0	10.5	0	0	0	11.7		0	0	0	0	0	0	0										0	0	0	0	0	0		0	0	0	0	0	0
Cyclamate	0	0	1390	0	0	0	0		0	0	107	0	0	294	164		0	0	689	0	0	0	0		0	275	0	0	0	0		0	679	0	0	0	0
DEET	0	11.3	0	0	27.4	0	178		0	0	0	0	14.6	62	17.8		0	12.6	125	39	29.7	15.7	15.3		221	32.4	490	27.8	252	59.5		26	244	19.2	28.1	25.3	30.7
PFOS	0	0	0	0	4.1	0	0		0	0	3.2	0	0	0	0		0	0	0	0	0	0	0		0	0	0	0	0	0		0	0	0	0	0	0
Cyclophosphamide	21.4	13.6	0	0	34.9	0	0		0	0	0	0	0	0	0		0	0	0	0	0	0	0		0	0	0	0	0	0		0	0	0	0	0	0
Paraxanthine	0	0	115	0	0	0	0		0	0	0	0	0	241	115		0	0	170	0	0	0	0		0	0	0	544	0	0		0	290	0	0	0	0
Ibuprofen	0	22.5	57.2	27	0	0	0		32	252	51.2	28.4	22.5	137	46		0	0	40.5	0	0	0	0		0	20.6	0	51.6	0	0		0	95.9	0	0	0	0
Naproxene	0	0	54.4	0	0	69	56.7		0	0	0	0	0	0	0		0	0	0	0	0	0	0		0	0	0	0	0	0		0	0	0	0	0	0
Saccharin	0	0	162	0	0	0	56.5		70.8	0	159	142	122	323	195		0	0	172	0	0	0	0		0	54.2	0	190	0	0		0	164	0	0	0	0
Paracetamol	0	0	28	0	16.2	0	16.4		20.9	0	18.7	17.5	12.2	40.7	61.6		0	0	17.8	0	0	0	0		0	0	0	20.8	0	0		0	36.4	0	0	0	0
Iohexol	0	0	0	0	0	0	0		70.4	0	0	0	80.4	143	57.1		0	0	0	0	0	0	0		0	0	0	0	0	0		0	0	0	0	0	0
Ibuprofen-2-hydroxy	0	0	0	0	0	0	0		90.3	98.7	68.8	110	65.7	318	157		0	0	0	0	0	0	0		0	0	0	0	0	0		0	0	0	0	0	0
Ibuprofen-carboxy	0	0	0	0	0	0	0		27.6	0	0	30.5	29.7	59.1	62.1		0	0	0	0	0	0	0		0	0	0	0	0	0		0	0	0	0	0	0
Alfuzosin	0	0	0	0	0	0	0		37.8	13.9	16.4	0	13.2	36.6	15.9		0	0	0	0	0	0	0		0	0	0	0	0	0		0	0	0	0	0	0
Sulfamethazin	0	0	0	0	0	0	0		0	0	0	0	0	0	0		23.7	28.2	29.5	33.9	45.1	29.9	28.6		36.2	24.1	37.2	39	28.2	42.5		25.9	32.4	34.6	43	42.4	45.7
Caffein	0	0	0	0	0	0	0		0	0	0	0	0	201	145		0	0	417	0	0	0	0		0	0	0	836	0	0		0	485	0	0	0	0
Diatrizoate	0	0	0	0	0	0	0		0	0	0	0	0	0	0		0	0	0	0	0	0	0		0	0	0	0	0	0		0	0	0	0	0	0
Methylparaben	0	0	0	0	0	0	0		0	0	0	0	0	0	0		0	0	58.3	0	0	0	0		0	0	0	76.4	0	0		0	100	0	0	0	0
Bisfenol S	0	0	0	27.3	0	0	0		0	0	0	0	0	0	0		0	0	46.9	0	0	0	0		0	0	0	65.2	0	0		0	104	0	0	0	0
Cotinine	0	0	0	0	0	0	25.3		0	0	0	0	0	0	0		0	0	0	0	0	0	0		0	0	0	34.8	0	0		0	0	0	0	0	0
Ethylparaben	0	0	0	0	0	0	0		0	0	0	0	0	0	0		0	0	0	0	0	0	0		0	0	0	0	0	0		0	11.3	0	0	0	0
Propylparaben	0	0	0	0	0	0	0		0	0	0	0	0	0	0		0	0	0	0	0	0	0		0	0	0	23.2	0	0		0	23.2	0	0	0	0
Amitriptiline	0	0	0	0	0	0	0		0	0	0	0	0	0	0		0	0	0	0	0	0	0		0	0	0	11.9	0	0		0	0	0	0	0	0

## Sheet: CP1
Č.vzorku	7879	8201	8369	8374	8536	8541			Datum odběru	2022-11-07	2022-11-20	2022-11-24	2022-11-30	2022-12-08	2022-12-12
Datum odběru	2022-11-07	2022-11-20	2022-11-24	2022-11-30	2022-12-08	2022-12-12			Karbamazepin	18.4	12.5	25.4	39.3	15.8	56.4	27.9667
Název vzorku	CP1	CP1	CP1	CP1	CP1	CP1			Diclofenac	21.9	0	112	263	31.9	296	120.8
Karbamazepin	18.4	12.5	25.4	39.3	15.8	56.4			Gabapentin	85.4	40.7	126	59.2	50.6	251	102.15
Erythromycin	<10,0	<10,0	<10,0	<10,0	<10,0	<10,0			Valsartan acid	98.6	70.7	209	259	79.9	324	173.533
Sulfamethoxazol	<10,0	<10,0	<10,0	<10,0	<10,0	<10,0			4-acetamidoantipyrin	40.3	21.2	69.7	97.9	27.1	151	67.8667
Iopromide	<50,0	<50,0	78.3	61.8	<50,0	92.8			Acesulfam	142	171	200	187	158	205	177.167
Ibuprofen	<20,0	20.6	<20,0	51.6	<20,0	<20,0			Primidone	22	15.6	18	15.7	22.4	50.8	24.0833
Diclofenac	21.9	<20,0	112	263	31.9	296			Sulfanilamide	0	0	69.2	55.9	0	102	37.85
Iopamidol	<50,0	<50,0	<50,0	<50,0	<50,0	<50,0			Diclofenac-4-hydroxy	0	0	41.4	68.8	0	146	42.7
Atenolol	<10,0	<10,0	<10,0	<10,0	<10,0	<10,0			Oxypurinol	0	0	338	849	69.2	1690	491.033
Caffein	<100	<100	<100	836	<100	<100			Iomeprol	0	0	0	69.8	0	196	44.3
Ketoprofen	<10,0	<10,0	<10,0	49.8	<10,0	<10,0			Benzotriazol	0	0	92.6	196	33.8	420	123.733
Metoprolol	<10,0	<10,0	<10,0	<10,0	<10,0	<10,0			Benzotriazol 5-methy	0	0	21.2	34.3	0	46	16.9167
Peniciline G	<10,0	<10,0	<10,0	<10,0	<10,0	<10,0			Iopromide	0	0	78.3	61.8	0	92.8	38.8167
Sulfamerazine	<10,0	<10,0	<10,0	<10,0	<10,0	<10,0			Furosemide	0	0	62	62	0	142	44.3333
Sulfamethazin	36.2	24.1	37.2	39	28.2	42.5			Hydrochlorothiazide	0	0	68.3	120	0	198	64.3833
Sulfapyridin	11.3	<10,0	22.4	33.3	11.4	68.4
Trimetoprim	<10,0	<10,0	<10,0	<10,0	<10,0	<10,0
Furosemide	<50,0	<50,0	62	62	<50,0	142
Gemfibrozil	<10,0	<10,0	<10,0	<10,0	<10,0	<10,0
Hydrochlorothiazide	<50,0	<50,0	68.3	120	<50,0	198
Naproxene	<50,0	<50,0	<50,0	<50,0	<50,0	<50,0
Triclocarban	<10,0	<10,0	<10,0	<10,0	<10,0	<10,0
Triclosan	<20,0	<20,0	<20,0	<20,0	<20,0	<20,0
Chloramphenicol	<20,0	<20,0	<20,0	<20,0	<20,0	<20,0
Bezafibrate	<10,0	<10,0	<10,0	<10,0	<10,0	<10,0
Warfarin	<10,0	<10,0	<10,0	<10,0	<10,0	<10,0
Saccharin	<50,0	54.2	<50,0	190	<50,0	<50,0
Gabapentin	85.4	40.7	126	59.2	50.6	251
Tramadol	<10,0	<10,0	<10,0	<10,0	<10,0	<10,0
Paracetamol	<10,0	<10,0	<10,0	20.8	<10,0	<10,0
Sulfanilamide	<50,0	<50,0	69.2	55.9	<50,0	102
Clarithromycin	<10,0	<10,0	<10,0	<10,0	<10,0	<10,0
Roxithromycin	<10,0	<10,0	<10,0	<10,0	<10,0	<10,0
Azithromycin	<10,0	<10,0	<10,0	<10,0	<10,0	<10,0
Karbamazepin-E	<10,0	<10,0	<10,0	<10,0	<10,0	<10,0
Karbamazepin-DHH	<10,0	<10,0	<10,0	<10,0	<10,0	<10,0
Karbamazepin-DH	<10,0	<10,0	<10,0	<10,0	<10,0	<10,0
Oxcarbazepine	<10,0	<10,0	<10,0	<10,0	<10,0	<10,0
Ibuprofen-2-hydroxy	<30,0	<30,0	<30,0	<30,0	<30,0	<30,0
Ibuprofen-carboxy	<20,0	<20,0	<20,0	<20,0	<20,0	<20,0
Diclofenac-4-hydroxy	<20,0	<20,0	41.4	68.8	<20,0	146
Naproxene-O-desmeth.	<20,0	<20,0	<20,0	<20,0	<20,0	<20,0
Venlafaxine	<10,0	<10,0	<10,0	<10,0	<10,0	<10,0
Sertraline	<10,0	<10,0	<10,0	<10,0	<10,0	<10,0
Ranitidine	<10,0	<10,0	<10,0	<10,0	<10,0	<10,0
Iohexol	<50,0	<50,0	<50,0	<50,0	<50,0	<50,0
Karbamazepin-2-hydr.	<10,0	<10,0	<10,0	<10,0	<10,0	<10,0
Clofibric acid	<10,0	<10,0	<10,0	<10,0	<10,0	<10,0
Cotinine	<20,0	<20,0	<20,0	34.8	<20,0	<20,0
Paraxanthine	<100	<100	<100	544	<100	<100
Acesulfam	142	171	200	187	158	205
Bisfenol B	<50,0	<50,0	<50,0	<50,0	<50,0	<50,0
Bisfenol S	<20,0	<20,0	<20,0	65.2	<20,0	<20,0
Oxypurinol	<50,0	<50,0	338	849	69.2	1690
Tiamulin	<10,0	<10,0	<10,0	<10,0	<10,0	<10,0
Acebutolol	<10,0	<10,0	<10,0	<10,0	<10,0	<10,0
Alfuzosin	<10,0	<10,0	<10,0	<10,0	<10,0	<10,0
Bisoprolol	<10,0	<10,0	<10,0	<10,0	<10,0	<10,0
Celiprolol	<10,0	<10,0	<10,0	<10,0	<10,0	<10,0
Citalopram	<20,0	<20,0	<20,0	<20,0	<20,0	<20,0
Clindamycin	<10,0	<10,0	<10,0	<10,0	<10,0	<10,0
Cyclophosphamide	<10,0	<10,0	<10,0	<10,0	<10,0	<10,0
Diltiazem	<10,0	<10,0	<10,0	<10,0	<10,0	<10,0
Fexofenadine	<10,0	<10,0	<10,0	<10,0	<10,0	<10,0
Fluconazole	<10,0	<10,0	<10,0	<10,0	<10,0	<10,0
Fluoxentine	<10,0	<10,0	<10,0	<10,0	<10,0	<10,0
Iomeprol	<50,0	<50,0	<50,0	69.8	<50,0	196
Irbesartan	<10,0	<10,0	<10,0	<10,0	<10,0	<10,0
Ivermectin	<50,0	<50,0	<50,0	<50,0	<50,0	<50,0
Lamotrigine	<10,0	<10,0	<10,0	11.7	<10,0	43.6
Lovastatin	<10,0	<10,0	<10,0	<10,0	<10,0	<10,0
Memantine	<20,0	<20,0	<20,0	<20,0	<20,0	<20,0
Mirtazapine	<10,0	<10,0	<10,0	<10,0	<10,0	<10,0
Phenazone	<10,0	<10,0	<10,0	<10,0	<10,0	16.7
Primidone	22	15.6	18	15.7	22.4	50.8
Propranolol	<10,0	<10,0	<10,0	<10,0	<10,0	<10,0
Propyphenazone	<10,0	<10,0	<10,0	<10,0	<10,0	<10,0
Simvastatin	<10,0	<10,0	<10,0	<10,0	<10,0	<10,0
Sotalol	<10,0	<10,0	<10,0	<10,0	<10,0	29.2
Telmisartan	<20,0	<20,0	<20,0	<20,0	<20,0	<20,0
Valsartan	<10,0	<10,0	10.8	<10,0	<10,0	11.3
Metformin	<20,0	180	<20,0	40.1	162	<20,0
DEET	221	32.4	490	27.8	252	59.5
OMC	<200	<200	<200	<200	<200	<200
PFOS	<3,00	<3,00	<3,00	<3,00	<3,00	<3,00
PFOA	<5,00	<5,00	<5,00	<5,00	<5,00	<5,00
Benzotriazol	<20,0	<20,0	92.6	196	33.8	420
Benzotriazol 5-methy	<20,0	<20,0	21.2	34.3	<20,0	46
Benzotriazol 1-methy	<50,0	<50,0	<50,0	<50,0	<50,0	<50,0
4-formylaminoantipyr	73.9	46.2	78.9	81.1	43.4	93.7
Atorvastatin	<10,0	<10,0	<10,0	<10,0	<10,0	<10,0
Butylparaben	<10,0	<10,0	<10,0	<10,0	<10,0	<10,0
Climbazole	<10,0	<10,0	<10,0	<10,0	<10,0	<10,0
Cyclamate	<100	275	<100	<100	<100	<100
Diatrizoate	<50,0	<50,0	<50,0	<50,0	<50,0	<50,0
Ethylparaben	<10,0	<10,0	<10,0	<10,0	<10,0	<10,0
Methylparaben	<30,0	<30,0	<30,0	76.4	<30,0	<30,0
Norverapamil	<10,0	<10,0	<10,0	<10,0	<10,0	<10,0
Propylparaben	<20,0	<20,0	<20,0	23.2	<20,0	<20,0
Salbutamol	<10,0	<10,0	<10,0	<10,0	<10,0	<10,0
Sucralose	<1000	<1000	2090	2130	<1000	3090
Valsartan acid	98.6	70.7	209	259	79.9	324
Verapamil	<10,0	<10,0	<10,0	<10,0	<10,0	<10,0
Amitriptiline	<10,0	<10,0	<10,0	11.9	<10,0	<10,0
Disopyramide	<10,0	<10,0	<10,0	<10,0	<10,0	<10,0
Eprosartan	<10,0	<10,0	<10,0	<10,0	<10,0	<10,0
Lincomycin	<10,0	<10,0	<10,0	<10,0	<10,0	<10,0
Losartan	<10,0	<10,0	<10,0	<10,0	<10,0	<10,0
Venlafaxine O-desmet	<10,0	<10,0	<10,0	<10,0	<10,0	<10,0
4-acetamidoantipyrin	40.3	21.2	69.7	97.9	27.1	151
Cetirizine	<10,0	<10,0	<10,0	<10,0	<10,0	<10,0
Sitagliptin	<10,0	<10,0	<10,0	<10,0	<10,0	<10,0
Sulfadiazine	<10,0	<10,0	<10,0	<10,0	<10,0	<10,0
Torasemide	<10,0	<10,0	<10,0	<10,0	<10,0	<10,0

## Sheet: PZ1
	"pozadí"		čerpání
Č.vzorku	84	7878	8200	8368	8373	8535	8540
Datum odběru	2021-11-20	2022-11-07	2022-11-20	2022-11-24	2022-11-30	2022-12-08	2022-12-12
Název vzorku	PZ1	PZ1	PZ1	PZ1	PZ1	PZ1	PZ1					Datum odběru	2022-11-07	2022-11-20	2022-11-24	2022-11-30	2022-12-08	2022-12-12
Karbamazepin	16.2	18.9	17.4	22.1	36.2	45.2	49.6					Karbamazepin	18.9	17.4	22.1	36.2	45.2	49.6
Erythromycin	<10,0	<10,0	<10,0	<10,0	<10,0	<10,0	<10,0					Diclofenac	26	32.9	57.2	191	322	263
Sulfamethoxazol	<10,0	<10,0	<10,0	<10,0	<10,0	<10,0	<10,0					Gabapentin	82.2	54.8	81.5	185	220	240
Iopromide	<50,0	<50,0	<50,0	<50,0	80.7	74.9	77.6					Valsartan acid	87.6	77.5	135	260	259	243
Ibuprofen	<20,0	<20,0	40.5	<20,0	<20,0	<20,0	<20,0					4-acetamidoantipyrin	34.1	25.1	43.1	105	124	122
Diclofenac	<20,0	26	32.9	57.2	191	322	263					Sulfanilamide	0	0	65.3	111	96.1	97.7
Iopamidol	<50,0	<50,0	<50,0	<50,0	<50,0	<50,0	<50,0					Diclofenac-4-hydroxy	0	0	23.7	66.1	140	141
Atenolol	<10,0	<10,0	<10,0	<10,0	<10,0	<10,0	<10,0					Oxypurinol	0	0	0	299	811	1070
Caffein	<100	<100	417	<100	<100	<100	<100					Iomeprol	0	0	0	0	187	160
Ketoprofen	<10,0	<10,0	13.7	<10,0	<10,0	<10,0	<10,0					Benzotriazol	0	0	0	62.3	167	187
Metoprolol	<10,0	<10,0	<10,0	<10,0	<10,0	<10,0	<10,0					Benzotriazol 5-methy	0	0	0	22.2	32.9	28
Peniciline G	<10,0	<10,0	<10,0	<10,0	<10,0	<10,0	<10,0					Iopromide	0	0	0	80.7	74.9	77.6
Sulfamerazine	<10,0	<10,0	<10,0	<10,0	<10,0	<10,0	<10,0					Furosemide	0	0	0	97.6	121	128
Sulfamethazin	23.7	28.2	29.5	33.9	45.1	29.9	28.6					Hydrochlorothiazide	0	0	0	102	174	181
Sulfapyridin	<10,0	10.6	<10,0	<10,0	26.4	51.8	55.5
Trimetoprim	<10,0	<10,0	<10,0	<10,0	<10,0	<10,0	<10,0
Furosemide	<50,0	<50,0	<50,0	<50,0	97.6	121	128
Gemfibrozil	<10,0	<10,0	<10,0	<10,0	<10,0	<10,0	<10,0
Hydrochlorothiazide	<50,0	<50,0	<50,0	<50,0	102	174	181
Naproxene	<50,0	<50,0	<50,0	<50,0	<50,0	<50,0	<50,0
Triclocarban	<10,0	<10,0	<10,0	<10,0	<10,0	<10,0	<10,0
Triclosan	<20,0	<20,0	<20,0	<20,0	<20,0	<20,0	<20,0
Chloramphenicol	<20,0	<20,0	<20,0	<20,0	<20,0	<20,0	<20,0
Bezafibrate	<10,0	<10,0	<10,0	<10,0	<10,0	<10,0	<10,0
Warfarin	<10,0	<10,0	<10,0	<10,0	<10,0	<10,0	<10,0
Saccharin	<50,0	<50,0	172	<50,0	<50,0	<50,0	<50,0
Gabapentin	24.4	82.2	54.8	81.5	185	220	240
Tramadol	<10,0	<10,0	<10,0	<10,0	<10,0	<10,0	<10,0
Paracetamol	<10,0	<10,0	17.8	<10,0	<10,0	<10,0	<10,0
Sulfanilamide	51.5	<50,0	<50,0	65.3	111	96.1	97.7
Clarithromycin	<10,0	<10,0	<10,0	<10,0	<10,0	<10,0	<10,0
Roxithromycin	<10,0	<10,0	<10,0	<10,0	<10,0	<10,0	<10,0
Azithromycin	<10,0	<10,0	<10,0	<10,0	<10,0	<10,0	<10,0
Karbamazepin-E	<10,0	<10,0	<10,0	<10,0	<10,0	<10,0	<10,0
Karbamazepin-DHH	<10,0	<10,0	<10,0	<10,0	<10,0	<10,0	<10,0
Karbamazepin-DH	<10,0	<10,0	<10,0	<10,0	<10,0	<10,0	<10,0
Oxcarbazepine	<10,0	<10,0	<10,0	<10,0	<10,0	<10,0	<10,0
Ibuprofen-2-hydroxy	<30,0	<30,0	<30,0	<30,0	<30,0	<30,0	<30,0
Ibuprofen-carboxy	<20,0	<20,0	<20,0	<20,0	<20,0	<20,0	<20,0
Diclofenac-4-hydroxy	<20,0	<20,0	<20,0	23.7	66.1	140	141
Naproxene-O-desmeth.	<20,0	<20,0	<20,0	<20,0	<20,0	<20,0	<20,0
Venlafaxine	<10,0	<10,0	<10,0	<10,0	<10,0	<10,0	<10,0
Sertraline	<10,0	<10,0	<10,0	<10,0	<10,0	<10,0	<10,0
Ranitidine	<10,0	<10,0	<10,0	<10,0	<10,0	<10,0	<10,0
Iohexol	<50,0	<50,0	<50,0	<50,0	<50,0	<50,0	<50,0
Karbamazepin-2-hydr.	<10,0	<10,0	<10,0	<10,0	<10,0	<10,0	<10,0
Clofibric acid	<10,0	<10,0	<10,0	<10,0	<10,0	<10,0	<10,0
Cotinine	<20,0	<20,0	<20,0	<20,0	<20,0	<20,0	<20,0
Paraxanthine	<100	<100	170	<100	<100	<100	<100
Acesulfam	221	185	221	234	217	216	206
Bisfenol B	<50,0	<50,0	<50,0	<50,0	<50,0	<50,0	<50,0
Bisfenol S	<50,0	<20,0	46.9	<20,0	<20,0	<20,0	<20,0
Oxypurinol	<50,0	<50,0	<50,0	<50,0	299	811	1070
Tiamulin	<10,0	<10,0	<10,0	<10,0	<10,0	<10,0	<10,0
Acebutolol	<10,0	<10,0	<10,0	<10,0	<10,0	<10,0	<10,0
Alfuzosin	<10,0	<10,0	<10,0	<10,0	<10,0	<10,0	<10,0
Bisoprolol	<10,0	<10,0	<10,0	<10,0	<10,0	<10,0	<10,0
Celiprolol	<10,0	<10,0	<10,0	<10,0	<10,0	<10,0	<10,0
Citalopram	<20,0	<20,0	<20,0	<20,0	<20,0	<20,0	<20,0
Clindamycin	<10,0	<10,0	<10,0	<10,0	<10,0	<10,0	<10,0
Cyclophosphamide	<10,0	<10,0	<10,0	<10,0	<10,0	<10,0	<10,0
Diltiazem	<10,0	<10,0	<10,0	<10,0	<10,0	<10,0	<10,0
Fexofenadine	<10,0	<10,0	<10,0	<10,0	<10,0	<10,0	<10,0
Fluconazole	<10,0	<10,0	<10,0	<10,0	<10,0	<10,0	<10,0
Fluoxentine	<10,0	<10,0	<10,0	<10,0	<10,0	<10,0	<10,0
Iomeprol	<50,0	<50,0	<50,0	<50,0	<50,0	187	160
Irbesartan	<10,0	<10,0	<10,0	<10,0	<10,0	<10,0	<10,0
Ivermectin	<50,0	<50,0	<50,0	<50,0	<50,0	<50,0	<50,0
Lamotrigine	<10,0	<10,0	<10,0	<10,0	<10,0	<10,0	<10,0
Lovastatin	<10,0	<10,0	<10,0	<10,0	<10,0	<10,0	<10,0
Memantine	<20,0	<20,0	<20,0	<20,0	<20,0	<20,0	<20,0
Mirtazapine	<10,0	<10,0	<10,0	<10,0	<10,0	<10,0	<10,0
Phenazone	<10,0	<10,0	<10,0	<10,0	<10,0	<10,0	11
Primidone	19.7	23.8	19.1	20.8	21.7	28.1	34.5
Propranolol	<10,0	<10,0	<10,0	<10,0	<10,0	<10,0	<10,0
Propyphenazone	<10,0	<10,0	<10,0	<10,0	<10,0	<10,0	<10,0
Simvastatin	<10,0	<10,0	<10,0	<10,0	<10,0	<10,0	<10,0
Sotalol	<10,0	<10,0	<10,0	<10,0	<10,0	<10,0	<10,0
Telmisartan	<20,0	<20,0	<20,0	<20,0	<20,0	<20,0	<20,0
Valsartan	<10,0	10	<10,0	10.7	12	<10,0	<10,0
Metformin	<20,0	<20,0	367	24.2	<20,0	48	<20,0
DEET	<10,0	12.6	125	39	29.7	15.7	15.3
OMC	<1000	<200	<200	<200	<200	<200	<200
PFOS	<5,0	<3,00	<3,00	<3,00	<3,00	<3,00	<3,00
PFOA	<10,0	<5,00	<5,00	<5,00	<5,00	<5,00	<5,00
Benzotriazol	<20,0	<20,0	<20,0	<20,0	62.3	167	187
Benzotriazol 5-methy	<20,0	<20,0	<20,0	<20,0	22.2	32.9	28
Benzotriazol 1-methy	<50,0	<50,0	<50,0	<50,0	<50,0	<50,0	<50,0
4-formylaminoantipyr	24.4	60.6	50.5	45.7	73.7	63.9	68.4
Atorvastatin	<10,0	<10,0	<10,0	<10,0	<10,0	<10,0	<10,0
Butylparaben	<10,0	<10,0	<10,0	<10,0	<10,0	<10,0	<10,0
Climbazole	<10,0	<10,0	<10,0	<10,0	<10,0	<10,0	<10,0
Cyclamate	<100	<100	689	<100	<100	<100	<100
Diatrizoate	<50,0	<50,0	<50,0	<50,0	<50,0	<50,0	<50,0
Ethylparaben	<10,0	<10,0	<10,0	<10,0	<10,0	<10,0	<10,0
Methylparaben	<30,0	<30,0	58.3	<30,0	<30,0	<30,0	<30,0
Norverapamil	<10,0	<10,0	<10,0	<10,0	<10,0	<10,0	<10,0
Propylparaben	<20,0	<20,0	<20,0	<20,0	<20,0	<20,0	<20,0
Salbutamol	<10,0	<10,0	<10,0	<10,0	<10,0	<10,0	<10,0
Sucralose	<1000	<1000	<1000	1480	3550	2650	2490
Valsartan acid	33.9	87.6	77.5	135	260	259	243
Verapamil	<10,0	<10,0	<10,0	<10,0	<10,0	<10,0	<10,0
Amitriptiline	<10,0	<10,0	<10,0	<10,0	<10,0	<10,0	<10,0
Disopyramide	<10,0	<10,0	<10,0	<10,0	<10,0	<10,0	<10,0
Eprosartan	<10,0	<10,0	<10,0	<10,0	<10,0	<10,0	<10,0
Lincomycin	<10,0	<10,0	<10,0	<10,0	<10,0	<10,0	<10,0
Losartan	<10,0	<10,0	<10,0	<10,0	<10,0	<10,0	<10,0
Venlafaxine O-desmet	<10,0	<10,0	<10,0	<10,0	<10,0	<10,0	<10,0
4-acetamidoantipyrin		34.1	25.1	43.1	105	124	122
Cetirizine		<10,0	<10,0	<10,0	<10,0	<10,0	<10,0
Sitagliptin		<10,0	<10,0	<10,0	<10,0	<10,0	<10,0
Sulfadiazine		<10,0	<10,0	<10,0	<10,0	<10,0	<10,0
Torasemide		<10,0	<10,0	<10,0	<10,0	<10,0	<10,0

## Sheet: COV
Č.vzorku		83	7877	8199	8367	8372	8534	8539
Datum odběru		2021-11-20	2022-11-07	2022-11-20	2022-11-24	2022-11-30	2022-12-08	2022-12-12
Název vzorku		ČOV	ČOV	ČOV	ČOV	ČOV	ČOV	ČOV
Karbamazepin	ng/l	187	353	273	324	376	184	221	274
Erythromycin	ng/l	<10,0	<10,0	10.5	<10,0	<10,0	<10,0	11.7
Sulfamethoxazol	ng/l	543	520	750	1050	1080	1120	1710	967.571
Iopromide	ng/l	52.3	70.9	313	240	2670	<50,0	93.5	573.283
Ibuprofen	ng/l	<20,0	22.5	57.2	27	<20,0	<20,0	<20,0
Diclofenac	ng/l	844	1580	1690	1650	3160	1440	1190	1650.57
Iopamidol	ng/l	<50,0	<50,0	<50,0	<50,0	<50,0	<50,0	<50,0
Atenolol	ng/l	38.5	36.4	29.8	27.2	29.5	49.2	70.5	40.1571
Caffein	ng/l	<100	<100	<100	<100	<100	<100	<100
Ketoprofen	ng/l	20.1	25.6	45	41.5	46.1	36.5	85.4	42.8857
Metoprolol	ng/l	573	789	810	1020	1120	568	675	793.571
Peniciline G	ng/l	<10,0	<10,0	<10,0	<10,0	<10,0	<10,0	<10,0
Sulfamerazine	ng/l	<10,0	<10,0	<10,0	<10,0	<10,0	<10,0	<10,0
Sulfamethazin	ng/l	<10,0	<10,0	<10,0	<10,0	<10,0	<10,0	<10,0
Sulfapyridin	ng/l	148	303	192	269	262	319	356	264.143
Trimetoprim	ng/l	136	139	178	203	214	258	427	222.143
Furosemide	ng/l	542	847	786	559	763	788	1240	789.286
Gemfibrozil	ng/l	<10,0	<10,0	<10,0	<10,0	<10,0	<10,0	<10,0
Hydrochlorothiazide	ng/l	981	1600	1360	1770	2120	1350	1690	1553
Naproxene	ng/l	<50,0	<50,0	54.4	<50,0	<50,0	69	56.7
Triclocarban	ng/l	<10,0	<10,0	<10,0	<10,0	<10,0	<10,0	<10,0
Triclosan	ng/l	<20,0	<20,0	<20,0	<20,0	<20,0	<20,0	<20,0
Chloramphenicol	ng/l	<20,0	<20,0	<20,0	<20,0	<20,0	<20,0	<20,0
Bezafibrate	ng/l	<10,0	<10,0	<10,0	<10,0	<10,0	<10,0	<10,0
Warfarin	ng/l	<10,0	10.1	10	10.3	12.3	<10,0	10.4	10.62
Saccharin	ng/l	<50,0	<50,0	162	<50,0	<50,0	<50,0	56.5
Gabapentin	ng/l	212	949	710	462	654	680	1160	689.571
Tramadol	ng/l	851	2010	1380	2090	2870	1240	1270	1673
Paracetamol	ng/l	<10,0	<10,0	28	<10,0	16.2	<10,0	16.4
Sulfanilamide	ng/l	50.3	285	56	81	68.7	233	232	143.714
Clarithromycin	ng/l	208	34	211	281	291	385	710	302.857
Roxithromycin	ng/l	<10,0	<10,0	<10,0	<10,0	<10,0	<10,0	<10,0
Azithromycin	ng/l	240	544	587	975	1680	653	987	809.429
Karbamazepin-E	ng/l	19.2	33.1	22.6	27.1	29.9	23.4	25.3	25.8
Karbamazepin-DHH	ng/l	22.9	21.3	31.2	33.6	40.8	38.3	42	32.8714
Karbamazepin-DH	ng/l	<10,0	<10,0	<10,0	<10,0	<10,0	<10,0	<10,0
Oxcarbazepine	ng/l	57.8	51.7	74.3	92.1	80.5	83.2	97.2	76.6857
Ibuprofen-2-hydroxy	ng/l	<30,0	<30,0	<30,0	<30,0	<30,0	<30,0	<30,0
Ibuprofen-carboxy	ng/l	<20,0	<20,0	<20,0	<20,0	<20,0	<20,0	<20,0
Diclofenac-4-hydroxy	ng/l	483	1010	572	639	635	743	894	710.857
Naproxene-O-desmeth.	ng/l	<20,0	<20,0	49.2	22.8	60.3	42	45
Venlafaxine	ng/l	129	225	215	264	270	202	247	221.714
Sertraline	ng/l	19.8	25.4	17.8	24.1	22.7	23.3	22.9	22.2857
Ranitidine	ng/l	<10,0	<10,0	<10,0	<10,0	<10,0	<10,0	<10,0
Iohexol	ng/l	<50,0	<50,0	<50,0	<50,0	<50,0	<50,0	<50,0
Karbamazepin-2-hydr.	ng/l	28.7	71.1	46.4	58.7	68.6	50.1	62.6	55.1714
Clofibric acid	ng/l	<10,0	<10,0	<10,0	<10,0	<10,0	<10,0	<10,0
Cotinine	ng/l	<20,0	<20,0	<20,0	<20,0	<20,0	<20,0	25.3
Paraxanthine	ng/l	<100	<100	115	<100	<100	<100	<100
Acesulfam	ng/l	107	102	146	74.3	119	122	229	128.471
Bisfenol B	ng/l	<50,0	<50,0	<50,0	<50,0	<50,0	<50,0	<50,0
Bisfenol S	ng/l	<50,0	<20,0	<20,0	27.3	<20,0	<20,0	<20,0
Oxypurinol	ng/l	7820	10200	13400	17100	21800	14700	12300	13902.9
Tiamulin	ng/l	<10,0	<10,0	<10,0	<10,0	<10,0	<10,0	<10,0
Acebutolol	ng/l	65.5	235	191	209	200	131	152
Alfuzosin	ng/l	<10,0	<10,0	<10,0	<10,0	<10,0	<10,0	<10,0
Bisoprolol	ng/l	102	136	138	128	158	142	202	143.714
Celiprolol	ng/l	147	284	308	365	382	179	209	267.714
Citalopram	ng/l	68.5	147	109	134	142	101	122	117.643
Clindamycin	ng/l	<10,0	37.1	21.5	53.1	57.6	44	36.4	41.6167
Cyclophosphamide	ng/l	21.4	13.6	<10,0	<10,0	34.9	<10,0	<10,0
Diltiazem	ng/l	<10,0	<10,0	<10,0	<10,0	<10,0	<10,0	<10,0
Fexofenadine	ng/l	30.6	58.7	97.5	83.7	73.7	40.8	36.9	60.2714
Fluconazole	ng/l	45.9	180	82.7	109	45.5	22.8	65	78.7
Fluoxentine	ng/l	<10,0	<10,0	<10,0	<10,0	<10,0	<10,0	<10,0
Iomeprol	ng/l	74.1	61.5	151	1980	<50,0	425	<50,0
Irbesartan	ng/l	45.7	127	85.5	132	134	109	131	109.171
Ivermectin	ng/l	<50,0	<50,0	<50,0	<50,0	<50,0	<50,0	<50,0
Lamotrigine	ng/l	446	1340	921	1370	1570	841	861	1049.86
Lovastatin	ng/l	<10,0	<10,0	<10,0	<10,0	<10,0	<10,0	<10,0
Memantine	ng/l	<20,0	<20,0	<20,0	<20,0	<20,0	<20,0	<20,0
Mirtazapine	ng/l	48.4	63.9	43	80.2	76.3	37.6	50.2	57.0857
Phenazone	ng/l	65.1	34.4	17.8	23.4	28.9	69.5	43.7	40.4
Primidone	ng/l	<10,0	19.9	57.5	70.6	71.9	91.9	107	69.8
Propranolol	ng/l	<10,0	<10,0	<10,0	<10,0	<10,0	<10,0	<10,0
Propyphenazone	ng/l	<10,0	<10,0	<10,0	<10,0	<10,0	<10,0	<10,0
Simvastatin	ng/l	<10,0	<10,0	<10,0	<10,0	<10,0	<10,0	<10,0
Sotalol	ng/l	104	536	167	189	188	438	401	289
Telmisartan	ng/l	3810	10000	7060	7940	10500	6180	5260	7250
Valsartan	ng/l	32.6	27.2	50.4	23.3	33.2	26.4	72.5	37.9429
Metformin	ng/l	56.1	147	3600	122	114	325	197	651.586
DEET	ng/l	<10,0	11.3	<10,0	<10,0	27.4	<10,0	178
OMC	ng/l	<1000	<200	<200	<200	<200	<200	<200
PFOS	ng/l	<5,0	<3,00	<3,00	<3,00	4.1	<3,00	<3,00
PFOA	ng/l	<10,0	<5,00	<5,00	<5,00	<5,00	<5,00	<5,00
Benzotriazol	ng/l	2150	4390	6640	6610	6290	5620	2140	4834.29
Benzotriazol 5-methy	ng/l	199	427	637	556	597	432	474	474.571
Benzotriazol 1-methy	ng/l	68.9	137	169	240	213	70.9	55.5	136.329
4-formylaminoantipyr	ng/l	122	221	175	261	321	412	513	289.286
Atorvastatin	ng/l	<10,0	<10,0	<10,0	<10,0	<10,0	<10,0	<10,0
Butylparaben	ng/l	<10,0	<10,0	<10,0	<10,0	<10,0	<10,0	<10,0
Climbazole	ng/l	<10,0	39.8	33.7	41.7	47.1	29.3	38.6	38.3667
Cyclamate	ng/l	<100	<100	1390	<100	<100	<100	<100
Diatrizoate	ng/l	<50,0	<50,0	<50,0	<50,0	<50,0	<50,0	<50,0
Ethylparaben	ng/l	<10,0	<10,0	<10,0	<10,0	<10,0	<10,0	<10,0
Methylparaben	ng/l	<30,0	<30,0	<30,0	<30,0	<30,0	<30,0	<30,0
Norverapamil	ng/l	<10,0	<10,0	<10,0	<10,0	<10,0	<10,0	<10,0
Propylparaben	ng/l	<20,0	<20,0	<20,0	<20,0	<20,0	<20,0	<20,0
Salbutamol	ng/l	<10,0	<10,0	<10,0	<10,0	<10,0	<10,0	<10,0
Sucralose	ng/l	5170	13000	10500	10100	9610	5510	5260	8450
Valsartan acid	ng/l	644	1430	797	1390	1470	1150	1280	1165.86
Verapamil	ng/l	<10,0	10	11.8	16.4	27.9	<10,0	12.4	15.7
Amitriptiline	ng/l	<10,0	<10,0	<10,0	<10,0	<10,0	<10,0	<10,0
Disopyramide	ng/l	<10,0	<10,0	<10,0	<10,0	<10,0	<10,0	<10,0
Eprosartan	ng/l	<10,0	<10,0	<10,0	<10,0	<10,0	<10,0	<10,0
Lincomycin	ng/l	<10,0	<10,0	<10,0	<10,0	<10,0	<10,0	<10,0
Losartan	ng/l	<10,0	11	21.3	14.2	20.9	<10,0	19.9	17.46
Venlafaxine O-desmet	ng/l	395	557	707	1000	934	464	434	641.571
4-acetamidoantipyrin	ng/l		451	491	721	910	927	1060	760
Cetirizine	ng/l		431	414	429	480	243	322	386.5
Sitagliptin	ng/l		300	242	343	315	191	261	275.333
Sulfadiazine	ng/l		<10,0	<10,0	<10,0	<10,0	<10,0	<10,0
Torasemide	ng/l		<10,0	<10,0	<10,0	<10,0	<10,0	<10,0
