# Supplementary material for: Behaviour of PPCP substances in a fluvial aquifer after infiltration of treated wastewater
Source: Research Square preprint supplement (doi:10.21203/rs.3.rs-3023391/v1), 2023-06-07
Supplement: Supplementary file 3 [file bdeeb1b9c022038fc5c0158a.xlsx]

## Sheet: List1
	Concentration of Oxypurinol in ng/l
Date of sampling	WWTP	Morava River	CP1 well	PZ1 well	PZ5 well
2022-11-07	10200	729	<50	<50	270
2022-11-20	13400	2350	<50	<50	540
2022-11-24	17100	1960	338	<50	438
2022-11-30	21800	2270	849	299	328
2022-12-08	14700	3050	analysis error	811	427
2022-12-12	12300	1600	1690	1070	366
Average	14917	1993	550	363	395
Median	14050	2115	379	150	400
