# Supplementary material for: Behaviour of PPCP substances in a fluvial aquifer after infiltration of treated wastewater
Source: Research Square preprint supplement (doi:10.21203/rs.3.rs-3023391/v1), 2023-06-07
Supplement: Supplementary file 4 [file ea3c47dbb7200efd30c88bd6.xlsx]

## Sheet: List1
PPCP substance	Labe	Isar	Jizera	Po	Sava	Brynica		Morava
	ng/l
Metformin	501	93.5	479	257	103.85	21		635
DEET	25.6	26.3	44.4	9.85	9.85	63		24
Telmisartan	195	52.7	222.5	35.95	10	191		494.429
Valsartan	15.9	97.5	19.65	25.85	21.3	376		35.3143
Valsartan acid	65.2	38	45.3	44	10.3	15		190.429
Benzotriazol methyl	97.3	160	41.6	48.35	26.4	152		170.057
Diclofenac	20	78.4	25	10	10	10		139.157
Iopromide	25	25	25	67.5	160	5		585.286
Irbesartan	5	33.7	10.3	16.3	23.75	25		25
Paracetamol		5	10.9	5	16.5	76		25
Gabapentin	119	81.9	110	35.05	8.55			217.714
Benzotriazol	256	348	210	93	45.4			562.857
Caffeine	141	155	120	50	50
Iohexol	25	206	25	25		5		50
Oxypurinol	526	370	362	204	25			1911
Acesulfam	164	65.5	284	84.65	25			242
Lamotrigine	38.9	58.1	37.9	5	5			113.771
Saccharin	75.9	25	74.2	25	25			144.543
Paraxanthine	145	50	159.5	50	50
Iomeprol	233	182	123	104.4	139.5			289.429
Ibuprofen	10	10	26.3	10				81.3
Clarithromycin	5	5	5		5			42.4857
4-formylaminoantipyr	72.6	114	53		27.35			158.357
Peniciline G	5	5	5			57
Tramadol	36.8	21.2	41.4			49		109.129
Carbamazepine	20.9	23.2	23	5				42.3857
Metoprolol	23	43.1	16.5			5		58.8143
PFOS	5.1	2.5	11.5		2.5
Fexofenadine	5	30.1		5	5			22
Hydrochlorothiazide	25	75.2	25		25			116.686
Bisphenol S	25	25			25
Carbamazepine-DHH		23		5		5
Erythromycin		5	5			79
Celiprolol	10		11			29		14
Cotinine	10	10	10
Iopamidol		25		940.5		170
Methylparaben	50	15	43.2
Primidone	5	5	17.25					33.1857
Venlafaxine	12.8	24.2	5					23
Venlafaxine O-desmethyl	28.65	58.9		5				97.2429
Sulfamethoxazole	15.8	22.7	17.1					59.0571
